# Supplementary material for: Diagnostic performance of GENEDIA W and ActiveXpress+ COVID-19 antigens tests among symptomatic individuals in Peru and The United Kingdom
Source: PLoS One. 2023 Mar 3;18(3):e0281925. doi: 10.1371/journal.pone.0281925 (PMC9983851; doi:10.1371/journal.pone.0281925)
Supplement: S1 File — (XLSX) [file pone.0281925.s001.xlsx]

## Sheet: data_site PE ActiveXpress
SAMP_ID	AGE	SEX	SYMPTOMS_YN	DAY_ONSET_Ag	SYMP_ONSET_D	SYMP_CATEG	SAMP_PCR_COL_D	PCR_SPEC	PCR_NAME	PCR_RES	PCR_GENE_1	PCR_CT_1	PCR_GENE_2	PCR_CT_2	PCR_GENE_3	PCR_CT_3	PCR_GENE_4	PCR_CT_4	PCR_GENE_IC	PCR_CT_IC	SAMP_AG_COL_D	AG_SPEC	AG_NAME	AG_RES
CV003051245	65	M	Y	11	2021-02-06		2021-02-17	NP	Norgen RT-PCR kit	ND											2021-02-17	NP	ActivXpress+	N
CV003051291	60	M	Y	4	2021-02-13		2021-02-17	NP	Norgen RT-PCR kit	D	N1	20.23	N2	19.49							2021-02-17	NP	ActivXpress+	P
CV003051292	21	F	Y	5	2021-02-12		2021-02-17	NP	Norgen RT-PCR kit	ND											2021-02-17	NP	ActivXpress+	N
CV003051293	37	F	Y	4	2021-02-13		2021-02-17	NP	Norgen RT-PCR kit	ND											2021-02-17	NP	ActivXpress+	N
CV003051294	51	F	Y	9	2021-02-09		2021-02-18	NP	Norgen RT-PCR kit	ND											2021-02-18	NP	ActivXpress+	N
CV003051296	39	M	Y	4	2021-02-14		2021-02-18	NP	Norgen RT-PCR kit	D	N1	30.64	N2	30.8							2021-02-18	NP	ActivXpress+	P
CV003051297	40	M	Y	4	2021-02-18		2021-02-22	NP	Norgen RT-PCR kit	ND											2021-02-22	NP	ActivXpress+	N
CV003051298	40	F	Y	10	2021-02-12		2021-02-22	NP	Norgen RT-PCR kit	ND											2021-02-22	NP	ActivXpress+	N
CV003051299	41	F	Y	9	2021-02-13		2021-02-22	NP	Norgen RT-PCR kit	ND											2021-02-22	NP	ActivXpress+	N
CV003051346	29	M	Y	5	2021-02-17		2021-02-22	NP	Norgen RT-PCR kit	D	N1	25.5	N2	25.12							2021-02-22	NP	ActivXpress+	N
CV003051356	26	F	Y	5	2021-02-17		2021-02-22	NP	Norgen RT-PCR kit	D	N1	22.2	N2	21.58							2021-02-22	NP	ActivXpress+	P
CV003051359	59	M	Y	8	2021-01-12		2021-01-20	NP	Norgen RT-PCR kit	D	N1	23.81	N2	23.7							2021-01-20	NP	ActivXpress+	P
CV003051360	18	F	Y	6	2021-01-21		2021-01-27	NP	Norgen RT-PCR kit	D	N1	23.62	N1	24.16							2021-01-27	NP	ActivXpress+	P
CV003051361	25	F	Y	8	2021-01-11		2021-01-19	NP	Norgen RT-PCR kit	ND											2021-01-19	NP	ActivXpress+	N
CV003051362	25	M	Y	6	2021-01-13		2021-01-19	NP	Norgen RT-PCR kit	ND											2021-01-19	NP	ActivXpress+	N
CV003051363	62	F	Y	5	2021-01-21		2021-01-26	NP	Norgen RT-PCR kit	D	N1	25.09	N2	25.98							2021-01-26	NP	ActivXpress+	P
CV003051364	54	F	Y	3	2021-01-23		2021-01-26	NP	Norgen RT-PCR kit	ND											2021-01-26	NP	ActivXpress+	N
CV003051366	29	F	Y	9	2021-01-18		2021-01-27	NP	Norgen RT-PCR kit	D	N1	25.61	N2	26.2							2021-01-27	NP	ActivXpress+	N
CV003051367	43	F	Y	3	2021-01-24		2021-01-27	NP	Norgen RT-PCR kit	ND											2021-01-27	NP	ActivXpress+	N
CV003051368	25	F	Y	6	2021-02-18		2021-02-24	NP	Norgen RT-PCR kit	ND											2021-02-24	NP	ActivXpress+	N
CV003051371	58	M	Y	3	2021-02-21		2021-02-24	NP	Norgen RT-PCR kit	ND											2021-02-24	NP	ActivXpress+	N
CV003051372	34	M	Y	5	2021-02-19		2021-02-24	NP	Norgen RT-PCR kit	D	N1	18.18	N2	16.87							2021-02-24	NP	ActivXpress+	P
CV003051373	44	M	Y	2	2021-02-20		2021-02-22	NP	Norgen RT-PCR kit	D	N1	15.41	N2	15							2021-02-22	NP	ActivXpress+	P
CV003051374	26	M	Y	6	2021-02-18		2021-02-24	NP	Norgen RT-PCR kit	ND											2021-02-24	NP	ActivXpress+	N
CV003051375	22	F	Y	5	2021-02-17		2021-02-22	NP	Norgen RT-PCR kit	D	N1	33.11	N2	32.98							2021-02-22	NP	ActivXpress+	N
CV003051386	29	F	Y	4	2021-02-20		2021-02-24	NP	Norgen RT-PCR kit	D	N1	16.71	N2	16.8							2021-02-24	NP	ActivXpress+	P
CV003051391	30	F	Y	4	2021-02-22		2021-02-26	NP	Norgen RT-PCR kit	D	N1	22.5	N2	22.06							2021-02-26	NP	ActivXpress+	P
CV003051400	30	M	Y	6	2021-02-19		2021-02-25	NP	Norgen RT-PCR kit	ND											2021-02-25	NP	ActivXpress+	N
CV003051404	25	M	Y	5	2021-02-20		2021-02-25	NP	Norgen RT-PCR kit	ND											2021-02-25	NP	ActivXpress+	N
CV003051406	46	F	Y	4	2021-02-22		2021-02-26	NP	Norgen RT-PCR kit	ND											2021-02-26	NP	ActivXpress+	N
CV003051462	40	F	Y	4	2021-02-21		2021-02-25	NP	Norgen RT-PCR kit	ND											2021-02-25	NP	ActivXpress+	N
CV003051463	52	M	Y	8	2021-02-18		2021-02-26	NP	Norgen RT-PCR kit	D	N1	34.23	N2	34.69							2021-02-26	NP	ActivXpress+	N
CV003051464	24	F	Y	5	2021-02-21		2021-02-26	NP	Norgen RT-PCR kit	ND											2021-02-26	NP	ActivXpress+	N
CV003051465	58	F	Y	4	2021-02-22		2021-02-26	NP	Norgen RT-PCR kit	ND											2021-02-26	NP	ActivXpress+	N
CV003051475	58	F	Y	7	2021-02-04		2021-02-11	NP	Norgen RT-PCR kit	ND											2021-02-11	NP	ActivXpress+	N
CV003051477	42	F	Y	6	2021-02-05		2021-02-11	NP	Norgen RT-PCR kit	ND											2021-02-11	NP	ActivXpress+	N
CV003051478	30	M	Y	3	2021-02-08		2021-02-11	NP	Norgen RT-PCR kit	ND											2021-02-11	NP	ActivXpress+	N
CV003051479	24	F	Y	6	2021-02-09		2021-02-15	NP	Norgen RT-PCR kit	D	N1	34.44	N2	34.24							2021-02-15	NP	ActivXpress+	N
CV003051480	42	F	Y	2	2021-02-22		2021-02-24	NP	Norgen RT-PCR kit	ND											2021-02-24	NP	ActivXpress+	N
CV003051481	55	F	Y	5	2021-02-21		2021-02-26	NP	Norgen RT-PCR kit	ND											2021-02-26	NP	ActivXpress+	N
CV003051486	32	M	Y	6	2021-02-06		2021-02-12	NP	Norgen RT-PCR kit	ND											2021-02-12	NP	ActivXpress+	N
CV003051487	27	F	Y	0	2021-02-06		2021-02-06	NP	Norgen RT-PCR kit	ND											2021-02-06	NP	ActivXpress+	N
CV003051488	34	M	Y	5	2021-02-07		2021-02-12	NP	Norgen RT-PCR kit	D	N1	16.02	N2	15.48							2021-02-12	NP	ActivXpress+	P
CV003051489	52	M	Y	5	2021-02-10		2021-02-15	NP	Norgen RT-PCR kit	D	N1	32.89	N2	32.5							2021-02-15	NP	ActivXpress+	N
CV003051490	65	F	Y	3	2021-02-12		2021-02-15	NP	Norgen RT-PCR kit	ND											2021-02-15	NP	ActivXpress+	N
CV003051491	61	F	Y	4	2021-02-12		2021-02-16	NP	Norgen RT-PCR kit	ND											2021-02-16	NP	ActivXpress+	N
CV003051492	23	F	Y	9	2021-02-07		2021-02-16	NP	Norgen RT-PCR kit	ND											2021-02-16	NP	ActivXpress+	N
CV003051493	46	F	Y	7	2021-02-09		2021-02-16	NP	Norgen RT-PCR kit	ND											2021-02-16	NP	ActivXpress+	N
CV003051496	19	M	Y	3	2021-02-12		2021-02-15	NP	Norgen RT-PCR kit	D	N1	31.55	N2	31.96							2021-02-15	NP	ActivXpress+	N
CV003051497	33	F	Y	7	2021-02-09		2021-02-16	NP	Norgen RT-PCR kit	D	N1	21.25	N2	19.86							2021-02-16	NP	ActivXpress+	P
CV003051498	24	F	Y	10	2021-02-02		2021-02-12	NP	Norgen RT-PCR kit	ND											2021-02-12	NP	ActivXpress+	N
CV003051499	23	M	Y	4	2021-02-08		2021-02-12	NP	Norgen RT-PCR kit	ND											2021-02-12	NP	ActivXpress+	N
CV003051501	54	F	Y	7	2021-03-01		2021-03-08	NP	Norgen RT-PCR kit	ND											2021-03-08	NP	ActivXpress+	N
CV003051502	43	F	Y	4	2021-03-04		2021-03-08	NP	Norgen RT-PCR kit	ND											2021-03-08	NP	ActivXpress+	N
CV003051503	37	M	Y	4	2021-03-04		2021-03-08	NP	Norgen RT-PCR kit	ND											2021-03-08	NP	ActivXpress+	N
CV003051504	23	F	Y	4	2021-03-05		2021-03-09	NP	Norgen RT-PCR kit	ND											2021-03-09	NP	ActivXpress+	N
CV003051505	30	F	Y	5	2021-03-05		2021-03-10	NP	Norgen RT-PCR kit	D	N1	14.48	N2	14.46							2021-03-10	NP	ActivXpress+	P
CV003051506	39	M	Y	10	2021-02-28		2021-03-10	NP	Norgen RT-PCR kit	D	N1	25.89	N2	25.5							2021-03-10	NP	ActivXpress+	P
CV003051507	38	F	Y	4	2021-03-06		2021-03-10	NP	Norgen RT-PCR kit	ND											2021-03-10	NP	ActivXpress+	N
CV003051508	42	M	Y	3	2021-03-07		2021-03-10	NP	Norgen RT-PCR kit	D	N1	27.7	N2	27.82							2021-03-10	NP	ActivXpress+	N
CV003051509	51	M	Y	3	2021-03-08		2021-03-11	NP	Norgen RT-PCR kit	ND											2021-03-11	NP	ActivXpress+	N
CV003051510	38	F	Y	5	2021-03-06		2021-03-11	NP	Norgen RT-PCR kit	ND											2021-03-11	NP	ActivXpress+	N
CV003051511	42	M	Y	6	2021-03-06		2021-03-12	NP	Norgen RT-PCR kit	ND											2021-03-12	NP	ActivXpress+	N
CV003051512	59	F	Y	6	2021-03-06		2021-03-12	NP	Norgen RT-PCR kit	D	N1	24.56	N2	24.85							2021-03-12	NP	ActivXpress+	P
CV003051513	31	F	Y	3	2021-03-09		2021-03-12	NP	Norgen RT-PCR kit	ND											2021-03-12	NP	ActivXpress+	N
CV003051514	55	F	Y	6	2021-03-06		2021-03-12	NP	Norgen RT-PCR kit	ND											2021-03-12	NP	ActivXpress+	N
CV003051515	28	F	Y	4	2021-03-08		2021-03-12	NP	Norgen RT-PCR kit	D	N1	21.03	N2	20.29							2021-03-12	NP	ActivXpress+	P
CV003051516	33	F	Y	7	2021-03-08		2021-03-15	NP	Norgen RT-PCR kit	D	N1	22.27	N2	22.19							2021-03-15	NP	ActivXpress+	P
CV003051517	47	F	Y	4	2021-03-11		2021-03-15	NP	Norgen RT-PCR kit	ND											2021-03-15	NP	ActivXpress+	N
CV003051518	66	F	Y	3	2021-03-12		2021-03-15	NP	Norgen RT-PCR kit	ND											2021-03-15	NP	ActivXpress+	N
CV003051519	28	M	Y	4	2021-03-11		2021-03-15	NP	Norgen RT-PCR kit	ND											2021-03-15	NP	ActivXpress+	N
CV003051520	55	M	Y	7	2021-03-08		2021-03-15	NP	Norgen RT-PCR kit	ND											2021-03-15	NP	ActivXpress+	N
CV003051521	50	F	Y	5	2021-03-11		2021-03-16	NP	Norgen RT-PCR kit	D	N1	22.77	N2	22.03							2021-03-16	NP	ActivXpress+	P
CV003051522	23	F	Y	4	2021-03-12		2021-03-16	NP	Norgen RT-PCR kit	ND											2021-03-16	NP	ActivXpress+	N
CV003051523	45	F	Y	7	2021-03-09		2021-03-16	NP	Norgen RT-PCR kit	D	N1	20.26	N2	19.94							2021-03-16	NP	ActivXpress+	P
CV003051524	57	M	Y	2	2021-03-15		2021-03-17	NP	Norgen RT-PCR kit	D	N1	11.15	N2	11.33							2021-03-17	NP	ActivXpress+	P
CV003051525	53	F	Y	4	2021-03-13		2021-03-17	NP	Norgen RT-PCR kit	D	N1	30.55	N2	30.34							2021-03-17	NP	ActivXpress+	N
CV003051526	58	F	Y	4	2021-03-13		2021-03-17	NP	Norgen RT-PCR kit	D	N1	37.26	N2	34.28							2021-03-17	NP	ActivXpress+	N
CV003051527	36	F	Y	7	2021-03-10		2021-03-17	NP	Norgen RT-PCR kit	D	N1	37.53	N2	33.78							2021-03-17	NP	ActivXpress+	N
CV003051528	68	M	Y	6	2021-03-11		2021-03-17	NP	Norgen RT-PCR kit	D	N1	27.81	N2	27.09							2021-03-17	NP	ActivXpress+	N
CV003051529	45	F	Y	4	2021-03-14		2021-03-18	NP	Norgen RT-PCR kit	D	N1	37.84	N2	33.41							2021-03-18	NP	ActivXpress+	N
CV003051530	45	M	Y	1	2021-03-17		2021-03-18	NP	Norgen RT-PCR kit	D	N1	20.02	N2	18.21							2021-03-18	NP	ActivXpress+	P
CV003051531	25	F	Y	1	2021-03-14		2021-03-15	NP	Norgen RT-PCR kit	D	N1	16.68	N2	16.16							2021-03-15	NP	ActivXpress+	P
CV003051532	19	F	Y	1	2021-03-14		2021-03-15	NP	Norgen RT-PCR kit	D	N1	18.15	N2	17.39							2021-03-15	NP	ActivXpress+	P
CV003051533	22	F	Y	3	2021-03-12		2021-03-15	NP	Norgen RT-PCR kit	ND											2021-03-15	NP	ActivXpress+	N
CV003051534	49	M	Y	1	2021-03-15		2021-03-16	NP	Norgen RT-PCR kit	D	N1	20.26	N2	19.79							2021-03-16	NP	ActivXpress+	P
CV003051535	29	M	Y	2	2021-03-14		2021-03-16	NP	Norgen RT-PCR kit	ND											2021-03-16	NP	ActivXpress+	N
CV003051536	39	F	Y	6	2021-03-10		2021-03-16	NP	Norgen RT-PCR kit	ND											2021-03-16	NP	ActivXpress+	N
CV003051537	28	M	Y	4	2021-03-13		2021-03-17	NP	Norgen RT-PCR kit	ND											2021-03-17	NP	ActivXpress+	N
CV003051538	47	F	Y	3	2021-03-14		2021-03-17	NP	Norgen RT-PCR kit	D	N1	18.81	N2	17.1							2021-03-17	NP	ActivXpress+	P
CV003051539	58	F	Y	2	2021-03-15		2021-03-17	NP	Norgen RT-PCR kit	D	N1	37.66	N2	33.64							2021-03-17	NP	ActivXpress+	N
CV003051540	19	M	Y	10	2021-03-08		2021-03-18	NP	Norgen RT-PCR kit	ND											2021-03-18	NP	ActivXpress+	N
CV003051541	36	F	Y	1	2021-03-17		2021-03-18	NP	Norgen RT-PCR kit	ND											2021-03-18	NP	ActivXpress+	N
CV003051542	22	F	Y	3	2021-03-15		2021-03-18	NP	Norgen RT-PCR kit	ND											2021-03-18	NP	ActivXpress+	N
CV003051543	22	M	Y	6	2021-03-12		2021-03-18	NP	Norgen RT-PCR kit	D	N1	26.13	N2	24.69							2021-03-18	NP	ActivXpress+	P
CV003051544	33	M	Y	1	2021-03-17		2021-03-18	NP	Norgen RT-PCR kit	D	N1	21.44	N2	20.5							2021-03-19	NP	ActivXpress+	P
CV003051545	26	F	Y	5	2021-03-14		2021-03-19	NP	Norgen RT-PCR kit	D	N1	26.66	N2	25.65							2021-03-19	NP	ActivXpress+	N
CV003051546	35	F	Y	1	2021-03-17		2021-03-18	NP	Norgen RT-PCR kit	ND											2021-03-18	NP	ActivXpress+	N
CV003051547	49	F	Y	4	2021-03-14		2021-03-18	NP	Norgen RT-PCR kit	ND											2021-03-18	NP	ActivXpress+	N
CV003051548	33	M	Y	3	2021-03-15		2021-03-18	NP	Norgen RT-PCR kit	D	N1	20.67	N2	19.46							2021-03-18	NP	ActivXpress+	P
CV003051549	33	F	Y	9	2021-03-10		2021-03-19	NP	Norgen RT-PCR kit	ND											2021-03-19	NP	ActivXpress+	N
CV003051550	29	M	Y	6	2021-03-13		2021-03-19	NP	Norgen RT-PCR kit	D	N1	26.31	N2	25.44							2021-03-19	NP	ActivXpress+	N
CV003051551	23	F	Y	8	2021-03-11		2021-03-19	NP	Norgen RT-PCR kit	ND											2021-03-19	NP	ActivXpress+	N
CV003051552	46	F	Y	6	2021-03-13		2021-03-19	NP	Norgen RT-PCR kit	ND											2021-03-19	NP	ActivXpress+	N
CV003051553	20	F	Y	4	2021-03-18		2021-03-22	NP	Norgen RT-PCR kit	D	N1	19.05	N2	17.97							2021-03-22	NP	ActivXpress+	P
CV003051554	60	F	Y	7	2021-03-15		2021-03-22	NP	Norgen RT-PCR kit	D	N1	23.85	N2	22.87							2021-03-22	NP	ActivXpress+	P
CV003051555	34	M	Y	5	2021-03-17		2021-03-22	NP	Norgen RT-PCR kit	D	N1	39.2	N2	36.29							2021-03-22	NP	ActivXpress+	N
CV003051556	53	F	Y	8	2021-03-14		2021-03-22	NP	Norgen RT-PCR kit	ND											2021-03-22	NP	ActivXpress+	N
CV003051557	51	F	Y	3	2021-03-19		2021-03-22	NP	Norgen RT-PCR kit	ND											2021-03-22	NP	ActivXpress+	N
CV003051558	50	F	Y	7	2021-03-15		2021-03-22	NP	Norgen RT-PCR kit	ND											2021-03-22	NP	ActivXpress+	N
CV003051559	46	M	Y	3	2021-03-20		2021-03-23	NP	Norgen RT-PCR kit	ND											2021-03-23	NP	ActivXpress+	N
CV003051560	33	M	Y	5	2021-03-18		2021-03-23	NP	Norgen RT-PCR kit	ND											2021-03-23	NP	ActivXpress+	N
CV003051561	68	M	Y	4	2021-03-15		2021-03-19	NP	Norgen RT-PCR kit	D	N1	22.75	N2	21.08							2021-03-19	NP	ActivXpress+	P
CV003051562	23	M	Y	4	2021-03-15		2021-03-19	NP	Norgen RT-PCR kit	D	N1	24.3	N2	23.23							2021-03-19	NP	ActivXpress+	P
CV003051563	35	M	Y	4	2021-03-20		2021-03-24	NP	Norgen RT-PCR kit	D	N1	19.37	N2	18.27							2021-03-24	NP	ActivXpress+	P
CV003051564	21	M	Y	4	2021-03-20		2021-03-24	NP	Norgen RT-PCR kit	D	N1	38.4	N2	33.13							2021-03-24	NP	ActivXpress+	N
CV003051565	47	F	Y	2	2021-03-22		2021-03-24	NP	Norgen RT-PCR kit	D	N1	31.32	N2	31.02							2021-03-24	NP	ActivXpress+	N
CV003051566	52	F	Y	4	2021-03-20		2021-03-24	NP	Norgen RT-PCR kit	D	N1	32.97	N2	31.97							2021-03-24	NP	ActivXpress+	N
CV003051567	42	F	Y	3	2021-03-21		2021-03-24	NP	Norgen RT-PCR kit	D	N1	34.71	N2	32.07							2021-03-24	NP	ActivXpress+	N
CV003051569	22	M	Y	5	2021-03-25		2021-03-30	NP	Norgen RT-PCR kit	ND											2021-03-30	NP	ActivXpress+	N

## Sheet: data_site PE Genedia
SAMP_ID	AGE	SEX	SYMPTOMS_YN	DAY_ONSET_Ag	SYMP_ONSET_D	SYMP_CATEG	SAMP_PCR_COL_D	PCR_SPEC	PCR_NAME	PCR_RES	PCR_GENE_1	PCR_CT_1	PCR_GENE_2	PCR_CT_2	PCR_GENE_3	PCR_CT_3	PCR_GENE_4	PCR_CT_4	PCR_GENE_IC	PCR_CT_IC	SAMP_AG_COL_D	AG_SPEC	AG_NAME	AG_RES
CV003051309	30	F	Y	2	2021-01-12		2021-01-14	NP	Norgen RT-PCR kit	ND											2021-01-14	NP	GENEDIA W Ag	N
CV003051310	28	F	Y	4	2021-01-12		2021-01-16	NP	Norgen RT-PCR kit	D	N1	25.36	N2	25.85							2021-01-16	NP	GENEDIA W Ag	P
CV003051349	26	M	Y	4	2021-01-14		2021-01-18	NP	Norgen RT-PCR kit	ND											2021-01-18	NP	GENEDIA W Ag	N
CV003051350	41	F	Y	5	2021-01-13		2021-01-18	NP	Norgen RT-PCR kit	ND											2021-01-18	NP	GENEDIA W Ag	N
CV003051351	22	F	Y	2	2021-01-13		2021-01-15	NP	Norgen RT-PCR kit	ND											2021-01-15	NP	GENEDIA W Ag	N
CV003051352	52	F	Y	7	2021-01-08		2021-01-15	NP	Norgen RT-PCR kit	ND											2021-01-15	NP	GENEDIA W Ag	N
CV003051353	44	F	Y	7	2021-01-08		2021-01-15	NP	Norgen RT-PCR kit	D	N1	33.9	N2	34.34							2021-01-15	NP	GENEDIA W Ag	N
CV003051354	33	M	Y	3	2021-01-12		2021-01-15	NP	Norgen RT-PCR kit	ND											2021-01-15	NP	GENEDIA W Ag	N
CV003051355	49	F	Y	9	2021-01-07		2021-01-16	NP	Norgen RT-PCR kit	D	N1	26.93	N2	25.65							2021-01-16	NP	GENEDIA W Ag	P
CV003051357	24	M	Y	2	2021-01-16		2021-01-18	NP	Norgen RT-PCR kit	D	N1	18.96	N2	18.82							2021-01-18	NP	GENEDIA W Ag	P
CV003051358	23	M	Y	2	2021-01-16		2021-01-18	NP	Norgen RT-PCR kit	ND											2021-01-18	NP	GENEDIA W Ag	N
CV003051365	38	M	Y	6	2021-01-26		2021-02-01	NP	Norgen RT-PCR kit	D	N1	17.21	N2	16.04							2021-02-01	NP	GENEDIA W Ag	P
CV003051369	40	M	Y	2	2021-01-30		2021-02-01	NP	Norgen RT-PCR kit	D	N1	21.2	N2	20.16							2021-02-01	NP	GENEDIA W Ag	P
CV003051370	38	F	Y	6	2021-01-26		2021-02-01	NP	Norgen RT-PCR kit	ND											2021-02-01	NP	GENEDIA W Ag	N
CV003051376	64	M	Y	3	2021-01-17		2021-01-20	NP	Norgen RT-PCR kit	D	N1	14.05	N2	12.2							2021-01-20	NP	GENEDIA W Ag	P
CV003051378	70	M	Y	2	2021-01-18		2021-01-20	NP	Norgen RT-PCR kit	ND											2021-01-20	NP	GENEDIA W Ag	N
CV003051379	30	M	Y	6	2021-01-08		2021-01-14	NP	Norgen RT-PCR kit	D	N1	27.14	N2	27.6							2021-01-14	NP	GENEDIA W Ag	P
CV003051380	29	F	Y	3	2021-01-11		2021-01-14	NP	Norgen RT-PCR kit	ND											2021-01-14	NP	GENEDIA W Ag	N
CV003051381	61	M	Y	5	2021-01-09		2021-01-14	NP	Norgen RT-PCR kit	D	N1	18.1	N2	18.34							2021-01-14	NP	GENEDIA W Ag	N
CV003051382	32	M	Y	3	2021-01-11		2021-01-14	NP	Norgen RT-PCR kit	ND											2021-01-14	NP	GENEDIA W Ag	N
CV003051383	59	F	Y	9	2021-01-05		2021-01-14	NP	Norgen RT-PCR kit	ND											2021-01-14	NP	GENEDIA W Ag	N
CV003051384	74	F	Y	4	2021-01-10		2021-01-14	NP	Norgen RT-PCR kit	ND											2021-01-14	NP	GENEDIA W Ag	N
CV003051385	30	F	Y	9	2021-01-05		2021-01-14	NP	Norgen RT-PCR kit	D	N1	37.94	N2	32.62							2021-01-14	NP	GENEDIA W Ag	N
CV003051387	47	M	Y	3	2021-01-15		2021-01-18	NP	Norgen RT-PCR kit	D	N1	23.26	N2	23.9							2021-01-18	NP	GENEDIA W Ag	N
CV003051388	21	M	Y	4	2021-01-15		2021-01-19	NP	Norgen RT-PCR kit	ND											2021-01-19	NP	GENEDIA W Ag	N
CV003051389	22	F	Y	13	2021-01-06		2021-01-19	NP	Norgen RT-PCR kit	ND											2021-01-19	NP	GENEDIA W Ag	N
CV003051390	43	M	Y	8	2021-01-11		2021-01-19	NP	Norgen RT-PCR kit	D	N1	25.61	N2	25.81							2021-01-19	NP	GENEDIA W Ag	N
CV003051392	80	F	Y	6	2021-01-13		2021-01-19	NP	Norgen RT-PCR kit	D	N1	20.45	N2	20.71							2021-01-19	NP	GENEDIA W Ag	P
CV003051393	18	M	Y	6	2021-01-13		2021-01-19	NP	Norgen RT-PCR kit	D	N1	16.22	N2	15.4							2021-01-19	NP	GENEDIA W Ag	P
CV003051394	20	M	Y	4	2021-01-16		2021-01-20	NP	Norgen RT-PCR kit	ND											2021-01-20	NP	GENEDIA W Ag	N
CV003051397	29	M	Y	5	2021-01-11		2021-01-16	NP	Norgen RT-PCR kit	D	N1	32.82	N2	34.02							2021-01-16	NP	GENEDIA W Ag	N
CV003051398	33	M	Y	6	2021-01-27		2021-02-02	NP	Norgen RT-PCR kit	D	N1	21.48	N2	21.63							2021-02-02	NP	GENEDIA W Ag	P
CV003051399	66	F	Y	2	2021-01-31		2021-02-02	NP	Norgen RT-PCR kit	ND											2021-02-02	NP	GENEDIA W Ag	N
CV003051401	24	M	Y	7	2021-01-13		2021-01-20	NP	Norgen RT-PCR kit	D	N1	32.19	N2	32.65							2021-01-20	NP	GENEDIA W Ag	N
CV003051402	30	F	Y	10	2021-01-11		2021-01-21	NP	Norgen RT-PCR kit	D	N1	19.96	N2	19.3							2021-01-21	NP	GENEDIA W Ag	P
CV003051403	29	M	Y	1	2021-01-20		2021-01-21	NP	Norgen RT-PCR kit	D	N1	17.54	N2	16.76							2021-01-21	NP	GENEDIA W Ag	P
CV003051405	40	F	Y	4	2021-01-18		2021-01-22	NP	Norgen RT-PCR kit	ND											2021-01-22	NP	GENEDIA W Ag	N
CV003051407	48	M	Y	6	2021-01-16		2021-01-22	NP	Norgen RT-PCR kit	D	N1	17.76	N2	17.62							2021-01-22	NP	GENEDIA W Ag	P
CV003051408	33	M	Y	5	2021-01-28		2021-02-02	NP	Norgen RT-PCR kit	D	N1	24.53	N2	25.81							2021-02-02	NP	GENEDIA W Ag	P
CV003051409	52	F	Y	6	2021-01-28		2021-02-03	NP	Norgen RT-PCR kit	ND											2021-02-03	NP	GENEDIA W Ag	N
CV003051410	65	M	Y	6	2021-01-28		2021-02-03	NP	Norgen RT-PCR kit	D	N1	26.24	N2	24.72							2021-02-03	NP	GENEDIA W Ag	P
CV003051411	21	F	Y	5	2021-01-29		2021-02-03	NP	Norgen RT-PCR kit	ND											2021-02-03	NP	GENEDIA W Ag	N
CV003051412	56	F	Y	5	2021-01-29		2021-02-03	NP	Norgen RT-PCR kit	ND											2021-02-03	NP	GENEDIA W Ag	N
CV003051413	32	F	Y	4	2021-01-31		2021-02-04	NP	Norgen RT-PCR kit	D	N1	21.39	N2	22.78							2021-02-04	NP	GENEDIA W Ag	P
CV003051414	40	F	Y	3	2021-02-01		2021-02-04	NP	Norgen RT-PCR kit	D	N1	20.01	N2	19.61							2021-02-04	NP	GENEDIA W Ag	P
CV003051415	38	F	Y	10	2021-01-25		2021-02-04	NP	Norgen RT-PCR kit	D	N1	30.81	N2	30.88							2021-02-04	NP	GENEDIA W Ag	N
CV003051416	38	F	Y	3	2021-02-01		2021-02-04	NP	Norgen RT-PCR kit	ND											2021-02-04	NP	GENEDIA W Ag	N
CV003051417	43	F	Y	4	2021-02-01		2021-02-05	NP	Norgen RT-PCR kit	ND											2021-02-05	NP	GENEDIA W Ag	N
CV003051418	28	M	Y	6	2021-01-30		2021-02-05	NP	Norgen RT-PCR kit	ND											2021-02-05	NP	GENEDIA W Ag	N
CV003051419	22	F	Y	4	2021-02-01		2021-02-05	NP	Norgen RT-PCR kit	ND											2021-02-05	NP	GENEDIA W Ag	N
CV003051420	33	M	Y	4	2021-02-01		2021-02-05	NP	Norgen RT-PCR kit	ND											2021-02-05	NP	GENEDIA W Ag	N
CV003051421	29	M	Y	4	2021-02-01		2021-02-05	NP	Norgen RT-PCR kit	D	N1	18.39	N2	18.08							2021-02-05	NP	GENEDIA W Ag	P
CV003051422	29	M	Y	6	2021-02-02		2021-02-08	NP	Norgen RT-PCR kit	ND											2021-02-08	NP	GENEDIA W Ag	N
CV003051423	43	M	Y	7	2021-02-01		2021-02-08	NP	Norgen RT-PCR kit	ND											2021-02-08	NP	GENEDIA W Ag	N
CV003051424	51	M	Y	7	2021-01-22		2021-01-29	NP	Norgen RT-PCR kit	ND											2021-01-29	NP	GENEDIA W Ag	N
CV003051425	23	F	Y	6	2021-01-23		2021-01-29	NP	Norgen RT-PCR kit	ND											2021-01-29	NP	GENEDIA W Ag	N
CV003051426	23	F	Y	2	2021-01-27		2021-01-29	NP	Norgen RT-PCR kit	ND											2021-01-29	NP	GENEDIA W Ag	N
CV003051427	18	F	Y	2	2021-01-27		2021-01-29	NP	Norgen RT-PCR kit	ND											2021-01-29	NP	GENEDIA W Ag	N
CV003051428	40	M	Y	5	2021-01-27		2021-02-01	NP	Norgen RT-PCR kit	ND											2021-02-01	NP	GENEDIA W Ag	N
CV003051429	37	F	Y	7	2021-01-25		2021-02-01	NP	Norgen RT-PCR kit	ND											2021-02-01	NP	GENEDIA W Ag	N
CV003051430	39	F	Y	3	2021-01-29		2021-02-01	NP	Norgen RT-PCR kit	ND											2021-02-01	NP	GENEDIA W Ag	N
CV003051431	36	F	Y	7	2021-01-25		2021-02-01	NP	Norgen RT-PCR kit	ND											2021-02-01	NP	GENEDIA W Ag	N
CV003051432	34	M	Y	7	2021-01-25		2021-02-01	NP	Norgen RT-PCR kit	D	N1	22.78	N2	21.29							2021-02-01	NP	GENEDIA W Ag	P
CV003051433	39	F	Y	3	2021-01-30		2021-02-02	NP	Norgen RT-PCR kit	D	N1	18.13	N2	17.15							2021-02-02	NP	GENEDIA W Ag	P
CV003051434	41	F	Y	6	2021-01-29		2021-02-04	NP	Norgen RT-PCR kit	D	N1	22.18	N2	22.36							2021-02-04	NP	GENEDIA W Ag	P
CV003051435	32	M	Y	1	2021-01-28		2021-01-29	NP	Norgen RT-PCR kit	D	N1	18.1	N2	17.44							2021-01-29	NP	GENEDIA W Ag	P
CV003051436	44	M	Y	4	2021-01-25		2021-01-29	NP	Norgen RT-PCR kit	D	N1	26.79	N2	26.45							2021-01-29	NP	GENEDIA W Ag	P
CV003051437	47	M	Y	4	2021-01-25		2021-01-29	NP	Norgen RT-PCR kit	D	N1	16.79	N2	15.81							2021-01-29	NP	GENEDIA W Ag	P
CV003051438	34	M	Y	2	2021-01-31		2021-02-02	NP	Norgen RT-PCR kit	D	N1	17.45	N2	16.36							2021-02-02	NP	GENEDIA W Ag	P
CV003051439	18	F	Y	8	2021-01-18		2021-01-26	NP	Norgen RT-PCR kit	D	N1	37.99	N2	33.57							2021-01-26	NP	GENEDIA W Ag	N
CV003051440	19	M	Y	4	2021-01-22		2021-01-26	NP	Norgen RT-PCR kit	ND											2021-01-26	NP	GENEDIA W Ag	N
CV003051441	41	M	Y	6	2021-01-21		2021-01-27	NP	Norgen RT-PCR kit	D	N1	21.13	N2	21.34							2021-01-27	NP	GENEDIA W Ag	P
CV003051442	33	F	Y	7	2021-01-19		2021-01-26	NP	Norgen RT-PCR kit	D	N1	27.45	N2	26.61							2021-01-26	NP	GENEDIA W Ag	P
CV003051443	25	F	Y	5	2021-01-22		2021-01-27	NP	Norgen RT-PCR kit	ND											2021-01-27	NP	GENEDIA W Ag	N
CV003051444	27	F	Y	4	2021-01-23		2021-01-27	NP	Norgen RT-PCR kit	ND											2021-01-27	NP	GENEDIA W Ag	P
CV003051445	39	M	Y	8	2021-01-20		2021-01-28	NP	Norgen RT-PCR kit	ND											2021-01-28	NP	GENEDIA W Ag	N
CV003051446	25	M	Y	4	2021-01-24		2021-01-28	NP	Norgen RT-PCR kit	ND											2021-01-28	NP	GENEDIA W Ag	N
CV003051447	31	M	Y	12	2021-01-16		2021-01-28	NP	Norgen RT-PCR kit	ND											2021-01-28	NP	GENEDIA W Ag	N
CV003051448	27	M	Y	7	2021-01-21		2021-01-28	NP	Norgen RT-PCR kit	D	N1	24.84	N2	25.66							2021-01-28	NP	GENEDIA W Ag	P
CV003051449	29	F	Y	3	2021-01-25		2021-01-28	NP	Norgen RT-PCR kit	ND											2021-01-28	NP	GENEDIA W Ag	N
CV003051450	27	M	Y	6	2021-01-22		2021-01-28	NP	Norgen RT-PCR kit	ND											2021-01-28	NP	GENEDIA W Ag	N
CV003051451	37	M	Y	7	2021-01-18		2021-01-25	NP	Norgen RT-PCR kit	ND											2021-01-25	NP	GENEDIA W Ag	N
CV003051452	33	M	Y	3	2021-01-22		2021-01-25	NP	Norgen RT-PCR kit	D	N1	17.56	N2	18.16							2021-01-25	NP	GENEDIA W Ag	P
CV003051453	41	F	Y	4	2021-01-21		2021-01-25	NP	Norgen RT-PCR kit	D	N1	26.05	N2	26.94							2021-01-25	NP	GENEDIA W Ag	P
CV003051454	40	F	Y	7	2021-01-18		2021-01-25	NP	Norgen RT-PCR kit	D	N1	25.34	N2	25.97							2021-01-25	NP	GENEDIA W Ag	P
CV003051455	41	M	Y	2	2021-01-31		2021-02-02	NP	Norgen RT-PCR kit	D	N1	16.53	N2	17.41							2021-02-02	NP	GENEDIA W Ag	P
CV003051456	30	M	Y	2	2021-02-01		2021-02-03	NP	Norgen RT-PCR kit	ND											2021-02-03	NP	GENEDIA W Ag	N
CV003051457	23	F	Y	6	2021-01-28		2021-02-03	NP	Norgen RT-PCR kit	D	N1	31.24	N2	31.35							2021-02-03	NP	GENEDIA W Ag	N
CV003051458	41	M	Y	4	2021-01-30		2021-02-03	NP	Norgen RT-PCR kit	ND											2021-02-03	NP	GENEDIA W Ag	N
CV003051459	51	M	Y	6	2021-01-29		2021-02-04	NP	Norgen RT-PCR kit	D	N1	28.88	N2	29.09							2021-02-04	NP	GENEDIA W Ag	P
CV003051460	59	F	Y	4	2021-02-06		2021-02-10	NP	Norgen RT-PCR kit	ND											2021-02-10	NP	GENEDIA W Ag	N
CV003051461	42	M	Y	8	2021-02-02		2021-02-10	NP	Norgen RT-PCR kit	D	N1	28.05	N2	28.84							2021-02-10	NP	GENEDIA W Ag	P
CV003051466	29	F	Y	6	2021-02-02		2021-02-08	NP	Norgen RT-PCR kit	ND											2021-02-08	NP	GENEDIA W Ag	N
CV003051467	30	M	Y	8	2021-02-01		2021-02-09	NP	Norgen RT-PCR kit	ND											2021-02-08	NP	GENEDIA W Ag	N
CV003051468	51	F	Y	8	2021-02-01		2021-02-09	NP	Norgen RT-PCR kit	ND											2021-02-09	NP	GENEDIA W Ag	N
CV003051469	35	M	Y	5	2021-02-04		2021-02-09	NP	Norgen RT-PCR kit	D	N1	24.05	N2	25.52							2021-02-09	NP	GENEDIA W Ag	N
CV003051470	50	F	Y	6	2021-02-03		2021-02-09	NP	Norgen RT-PCR kit	D	N1	31.2	N2	30.58							2021-02-09	NP	GENEDIA W Ag	N
CV003051471	45	F	Y	6	2021-02-03		2021-02-09	NP	Norgen RT-PCR kit	D	N1	27.24	N2	28.47							2021-02-09	NP	GENEDIA W Ag	N
CV003051472	41	F	Y	5	2021-02-04		2021-02-09	NP	Norgen RT-PCR kit	ND											2021-02-09	NP	GENEDIA W Ag	N
CV003051473	19	M	Y	4	2021-02-04		2021-02-08	NP	Norgen RT-PCR kit	D	N1	17.98	N2	17.76							2021-02-08	NP	GENEDIA W Ag	P
CV003051474	39	F	Y	7	2021-02-02		2021-02-09	NP	Norgen RT-PCR kit	ND											2021-02-09	NP	GENEDIA W Ag	N
CV003051476	40	F	Y	5	2021-02-05		2021-02-10	NP	Norgen RT-PCR kit	D	N1	18.94	N2	17.91							2021-02-10	NP	GENEDIA W Ag	P
CV003051483	70	F	Y	7	2021-02-02		2021-02-09	NP	Norgen RT-PCR kit	D	N1	23.13	N2	22.04							2021-02-09	NP	GENEDIA W Ag	N
CV003051484	62	M	Y	8	2021-02-01		2021-02-09	NP	Norgen RT-PCR kit	D	N1	31.34	N2	32.43							2021-02-09	NP	GENEDIA W Ag	N
CV003051485	27	M	Y	3	2021-02-07		2021-02-10	NP	Norgen RT-PCR kit	ND											2021-02-10	NP	GENEDIA W Ag	N
CV003051494	67	M	Y	11	2021-01-30		2021-02-10	NP	Norgen RT-PCR kit	D	N1	15.81	N2	14.94							2021-02-10	NP	GENEDIA W Ag	P
CV003051495	32	F	Y	3	2021-02-07		2021-02-10	NP	Norgen RT-PCR kit	D	N1	17.81	N2	17.14							2021-02-10	NP	GENEDIA W Ag	P
CV003051500	48	F	Y	4	2021-02-06		2021-02-10	NP	Norgen RT-PCR kit	D	N1	15.17	N2	14.26							2021-02-10	NP	GENEDIA W Ag	P

## Sheet: data_site LSTM ActiveXpress
SAMPLE_ID	AGE	SEX	SYMPTOMS_YN	DAY_ONSET_Ag	SAMP_AG_COL_D	SAMP_PCR_COL_D	SYMP_ONSET_D	PCR_SPEC	PCR_NAME	PCR_RES	PCR_N_gene_CT_value	PCR_ORF1ab_CT_value	PCR_S_gene_CT_value	AG_SPEC	AG_NAME	AG_RES
LJLA - 100	21	M	Y	2	25-01-2021	25-01-2021	23-01-2021	TN	TaqPath	N				NP	ActivXpress+	N
LJLA - 101	34	F	Y	14	25-01-2021	25-01-2021	11-01-2021	TN	TaqPath	N				NP	ActivXpress+	N
LJLA - 102	36	F	Y	0	25-01-2021	25-01-2021	25-01-2021	TN	TaqPath	N				NP	ActivXpress+	N
LJLA - 103	27	F	Y	NA	25-01-2021	25-01-2021	NA	TN	TaqPath	N				NP	ActivXpress+	N
LJLA - 104	31	F	Y	4	25-01-2021	25-01-2021	21-01-2021	TN	TaqPath	N				NP	ActivXpress+	N
LJLA - 105	42	F	Y	1	25-01-2021	25-01-2021	24-01-2021	TN	TaqPath	N				NP	ActivXpress+	N
LJLA - 106	30	F	Y	2	25-01-2021	25-01-2021	23-01-2021	TN	TaqPath	P	19.552	21.423	18.529	NP	ActivXpress+	P
LJLA - 107	30	F	Y	2	25-01-2021	25-01-2021	23-01-2021	TN	TaqPath	N				NP	ActivXpress+	N
LJLA - 108	27	F	Y	1	25-01-2021	25-01-2021	24-01-2021	TN	TaqPath	N				NP	ActivXpress+	N
LJLA - 109	35	F	Y	4	25-01-2021	25-01-2021	21-01-2021	TN	TaqPath	N				NP	ActivXpress+	N
LJLA - 110	48	M	Y	2	25-01-2021	25-01-2021	23-01-2021	TN	TaqPath	N			34.024	NP	ActivXpress+	N
LJLA - 111	52	F	Y	2	25-01-2021	25-01-2021	23-01-2021	TN	TaqPath	N				NP	ActivXpress+	N
LJLA - 112	55	F	Y	1	25-01-2021	25-01-2021	24-01-2021	TN	TaqPath	N				NP	ActivXpress+	N
LJLA - 113	56	M	Y	1	25-01-2021	25-01-2021	24-01-2021	TN	TaqPath	N				NP	ActivXpress+	N
LJLA - 114	34	F	Y	0	25-01-2021	25-01-2021	25-01-2021	TN	TaqPath	N				NP	ActivXpress+	N
LJLA - E016	40	M	Y	1	22-02-2021	22-02-2021	21-02-2021	TN	TaqPath	N				NP	ActivXpress+	N
LJLA - E017	30	M	Y	1	22-02-2021	22-02-2021	21-02-2021	TN	TaqPath	P	21.289	23.047	23.187	NP	ActivXpress+	P
LJLA - E018	45	F	Y	4	22-02-2021	22-02-2021	18-02-2021	TN	TaqPath	P	19.325	20.21	20.984	NP	ActivXpress+	P
LJLA - E019	27	F	Y	#VALUE!	22-02-0221	22-02-0221	21-02-0221	TN	TaqPath	N				NP	ActivXpress+	N
LJLA - E020	39	M	Y	1	22-02-2021	22-02-2021	21-02-2021	TN	TaqPath	N				NP	ActivXpress+	N
LJLA - E021	54	M	Y	2	22-02-2021	22-02-2021	20-02-2021	TN	TaqPath	N				NP	ActivXpress+	N
LJLA - E022	59	F	Y	7	22-02-2021	22-02-2021	15-02-2021	TN	TaqPath	N				NP	ActivXpress+	N
LJLA - E023	31	F	Y	1	22-02-2021	22-02-2021	21-02-2021	TN	TaqPath	N				NP	ActivXpress+	N
LJLA - E024	50	F	Y	1	22-02-2021	22-02-2021	21-02-2021	TN	TaqPath	N				NP	ActivXpress+	N
LJLA - E025	42	M	Y	1	22-02-2021	22-02-2021	21-02-2021	TN	TaqPath	N				NP	ActivXpress+	N
LJLA - E026	44	M	Y	1	22-02-2021	22-02-2021	21-02-2021	TN	TaqPath	N				NP	ActivXpress+	N
LJLA - E027	77	M	Y	7	22-02-2021	22-02-2021	15-02-2021	TN	TaqPath	N				NP	ActivXpress+	N
LJLA - E028	29	M	Y	0	22-02-2021	22-02-2021	22-02-2021	TN	TaqPath	N				NP	ActivXpress+	N
LJLA - E029	30	F	Y	2	22-02-2021	22-02-2021	20-02-2021	TN	TaqPath	N				NP	ActivXpress+	N
LJLA - E030	28	F	Y	2	22-02-2021	22-02-2021	20-02-2021	TN	TaqPath	N				NP	ActivXpress+	N
LJLA - E031	42	F	Y	1	22-02-2021	22-02-2021	21-02-2021	TN	TaqPath	N				NP	ActivXpress+	N
LJLA - E032	27	F	Y	1	22-02-2021	22-02-2021	21-02-2021	TN	TaqPath	N				NP	ActivXpress+	N
LJLA - E033	51	F	Y	1	22-02-2021	22-02-2021	21-02-2021	TN	TaqPath	N				NP	ActivXpress+	N
LJLA - E034	31	F	Y	3	23-02-2021	23-02-2021	20-02-2021	TN	TaqPath	N				NP	ActivXpress+	P
LJLA - E035	62	F	Y	1	23-02-2021	23-02-2021	22-02-2021	TN	TaqPath	N				NP	ActivXpress+	N
LJLA - E036	62	F	Y	5	23-02-2021	23-02-2021	18-02-2021	TN	TaqPath	Indeterminate	33.88			NP	ActivXpress+	N
LJLA - E037	66	F	Y	NA	23-02-2021	23-02-2021	NA	TN	TaqPath	N				NP	ActivXpress+	N
LJLA - E038	35	F	Y	7	23-02-2021	23-02-2021	16-02-2021	TN	TaqPath	P	20.477	22.549	21.199	NP	ActivXpress+	P
LJLA - E039	49	F	Y	5	23-02-2021	23-02-2021	18-02-2021	TN	TaqPath	N				NP	ActivXpress+	N
LJLA - E040	40	M	Y	1	24-02-2021	24-02-2021	23-02-2021	TN	TaqPath	N				NP	ActivXpress+	N
LJLA - E041	25	M	Y	1	24-02-2021	24-02-2021	23-02-2021	TN	TaqPath	N				NP	ActivXpress+	N
LJLA - E042	NA	F	Y	2	24-02-2021	24-02-2021	22-02-2021	TN	TaqPath	N				NP	ActivXpress+	N
LJLA - E043	46	F	Y	2	24-02-2021	24-02-2021	22-02-2021	TN	TaqPath	N				NP	ActivXpress+	N
LJLA - E044	67	F	Y	3	24-02-2021	24-02-2021	21-02-2021	TN	TaqPath	N				NP	ActivXpress+	N
LJLA - E045	43	M	Y	2	24-02-2021	24-02-2021	22-02-2021	TN	TaqPath	N				NP	ActivXpress+	N
LJLA - E046	38	F	Y	1	25-02-2021	25-02-2021	24-02-2021	TN	TaqPath	N				NP	ActivXpress+	N
LJLA - E047	30	M	Y	1	25-02-2021	25-02-2021	24-02-2021	TN	TaqPath	N				NP	ActivXpress+	N
LJLA - E048	43	M	Y	0	25-02-2021	25-02-2021	25-02-2021	TN	TaqPath	N				NP	ActivXpress+	N
LJLA - E049	69	F	Y	7	25-02-2021	25-02-2021	18-02-2021	TN	TaqPath	N				NP	ActivXpress+	N
LJLA - E050	70	M	Y	NA	01-03-2021	01-03-2021	NA	TN	TaqPath	N				NP	ActivXpress+	N
LJLA - E051	30	M	Y	3	01-03-2021	01-03-2021	26-02-2021	TN	TaqPath	N				NP	ActivXpress+	N
LJLA - E052	55	F	Y	1	01-03-2021	01-03-2021	28-02-2021	TN	TaqPath	N				NP	ActivXpress+	N
LJLA - E053	66	F	Y	5	01-03-2021	01-03-2021	24-02-2021	TN	TaqPath	N				NP	ActivXpress+	N
LJLA - E054	60	M	Y	90	01-03-2021	01-03-2021	01-12-2020	TN	TaqPath	N				NP	ActivXpress+	N
LJLA - E055	55	M	Y	-25	02-02-2021	02-02-2021	27-02-2021	TN	TaqPath	N				NP	ActivXpress+	N
LJLA - E056	35	F	Y	0	02-02-2021	02-02-2021	02-02-2021	TN	TaqPath	P	21.499	22.537	19.8	NP	ActivXpress+	P
LJLA - E057	53	F	Y	3	02-03-2021	02-03-2021	27-02-2021	TN	TaqPath	N				NP	ActivXpress+	N
LJLA - E058	39	F	Y	3	03-03-2021	03-03-2021	28-02-2021	TN	TaqPath	N			22.378	NP	ActivXpress+	N
LJLA - E059	40	F	Y	3	03-03-2021	03-03-2021	28-02-2021	TN	TaqPath	N				NP	ActivXpress+	N
LJLA - E060	39	F	Y	1	03-03-2021	03-03-2021	02-03-2021	TN	TaqPath	N				NP	ActivXpress+	N
LJLA - E061	52	F	Y	6	03-03-2021	03-03-2021	25-02-2021	TN	TaqPath	N				NP	ActivXpress+	N
LJLA - E062	32	F	Y	1	03-03-2021	03-03-2021	02-03-2021	TN	TaqPath	N				NP	ActivXpress+	N
LJLA - E063	40	M	Y	9	03-03-2021	03-03-2021	22-02-2021	TN	TaqPath	N				NP	ActivXpress+	N
LJLA - E064	49	F	Y	1	04-03-2021	04-03-2021	03-03-2021	TN	TaqPath	N				NP	ActivXpress+	N
LJLA - E065	33	M	Y	3	04-03-2021	04-03-2021	01-03-2021	TN	TaqPath	P	23.915	25.077	22.807	NP	ActivXpress+	P
LJLA - E066	41	M	Y	0	04-03-2021	04-03-2021	04-03-2021	TN	TaqPath	N				NP	ActivXpress+	N
LJLA - E067	44	F	Y	6	05-03-2021	05-03-2021	27-02-2021	TN	TaqPath	N				NP	ActivXpress+	N
LJLA - E068	42	F	Y	3	05-03-2021	05-03-2021	02-03-2021	TN	TaqPath	N				NP	ActivXpress+	N
LJLA - E069	34	M	Y	1	05-03-2021	05-03-2021	04-03-2021	TN	TaqPath	N				NP	ActivXpress+	N
LJLA - E070	57	F	Y	7	08-03-2021	08-03-2021	01-03-2021	TN	TaqPath	N				NP	ActivXpress+	N
LJLA - E071	40	F	Y	30	08-03-2021	08-03-2021	06-02-2021	TN	TaqPath	N				NP	ActivXpress+	N
LJLA - E072	32	F	Y	29	08-03-2021	08-03-2021	07-02-2021	TN	TaqPath	N				NP	ActivXpress+	N
LJLA - E073	55	F	Y	6	08-03-2021	08-03-2021	02-03-2021	TN	TaqPath	P	18.295	19.401		NP	ActivXpress+	P
LJLA - E075	39	F	Y	4	09-03-2021	09-03-2021	05-03-2021	TN	TaqPath	P	27.563	28.983		NP	ActivXpress+	P
LJLA - E076	56	F	Y	2	09-03-2021	09-03-2021	07-03-2021	TN	TaqPath	N				NP	ActivXpress+	N
LJLA - E077	52	M	Y	0	09-03-2021	09-03-2021	09-03-2021	TN	TaqPath	N				NP	ActivXpress+	N
LJLA - E078	23	F	Y	1	09-03-2021	09-03-2021	08-03-2021	TN	TaqPath	N				NP	ActivXpress+	N
LJLA - E079	30	M	Y	5	10-03-2021	10-03-2021	05-03-2021	TN	TaqPath	N				NP	ActivXpress+	N
LJLA - E080	40	F	Y	2	12-03-2021	12-03-2021	10-03-2021	TN	TaqPath	N				NP	ActivXpress+	N
LJLA - E081	32	F	Y	1	12-03-2021	12-03-2021	11-03-2021	TN	TaqPath	N				NP	ActivXpress+	N
LJLA - E082	63	F	Y	8	12-03-2021	12-03-2021	04-03-2021	TN	TaqPath	N				NP	ActivXpress+	N
LJLA - E083	61	M	Y	1	15-03-2021	15-03-2021	14-03-2021	TN	TaqPath	N				NP	ActivXpress+	N
LJLA - E084	60	F	Y	4	15-03-2021	15-03-2021	11-03-2021	TN	TaqPath	N				NP	ActivXpress+	N
LJLA - E085	48	F	Y	7	15-03-2021	15-03-2021	08-03-2021	TN	TaqPath	N				NP	ActivXpress+	N
LJLA - E086	29	F	Y	2	15-03-2021	15-03-2021	13-03-2021	TN	TaqPath	N				NP	ActivXpress+	N
LJLA - E087	62	M	Y	4	15-03-2021	15-03-2021	11-03-2021	TN	TaqPath	N				NP	ActivXpress+	N
LJLA - E088	19	M	Y	1	15-03-2021	15-03-2021	14-03-2021	TN	TaqPath	N				NP	ActivXpress+	N
LJLA - E089	33	M	Y	4	16-03-2021	16-03-2021	12-03-2021	TN	TaqPath	N				NP	ActivXpress+	N
LJLA - E090	63	M	Y	2	16-03-2021	16-03-2021	14-03-2021	TN	TaqPath	N				NP	ActivXpress+	N
LJLA - E091	19	F	Y	1	16-03-2021	16-03-2021	15-03-2021	TN	TaqPath	N				NP	ActivXpress+	N
LJLA - E092	24	M	Y	1	17-03-2021	17-03-2021	16-03-2021	TN	TaqPath	N				NP	ActivXpress+	N
LJLA - E093	33	M	Y	0	17-03-2021	17-03-2021	17-03-2021	TN	TaqPath	N				NP	ActivXpress+	N
LJLA - E094	33	F	Y	1	17-03-2021	17-03-2021	16-03-2021	TN	TaqPath	N				NP	ActivXpress+	N
LJLA - E095	30	M	Y	2	17-03-2021	17-03-2021	15-03-2021	TN	TaqPath	N				NP	ActivXpress+	N
LJLA - E096	60	F	Y	2	17-03-2021	17-03-2021	15-03-2021	TN	TaqPath	N				NP	ActivXpress+	N
LJLA - E097	32	M	Y	1	17-03-2021	17-03-2021	16-03-2021	TN	TaqPath	N				NP	ActivXpress+	N
LJLA - E098	32	F	Y	1	17-03-2021	17-03-2021	16-03-2021	TN	TaqPath	N				NP	ActivXpress+	N
LJLA - E099	23	F	Y	2	18-03-2021	18-03-2021	16-03-2021	TN	TaqPath	N				NP	ActivXpress+	N
LJLA - E100	26	F	Y	2	18-03-2021	18-03-2021	16-03-2021	TN	TaqPath	N				NP	ActivXpress+	N
LJLA - E101	43	F	Y	1	18-03-2021	18-03-2021	17-03-2021	TN	TaqPath	N				NP	ActivXpress+	N
LJLA - E102	40	M	Y	2	19-03-2021	19-03-2021	17-03-2021	TN	TaqPath	N				NP	ActivXpress+	N
LJLA - E103	37	F	Y	1	19-03-2021	19-03-2021	18-03-2021	TN	TaqPath	N				NP	ActivXpress+	N
LJLA - E104	38	M	Y	3	19-03-2021	19-03-2021	16-03-2021	TN	TaqPath	N				NP	ActivXpress+	N
LJLA - E105	32	M	Y	2	19-03-2021	19-03-2021	17-03-2021	TN	TaqPath	N				NP	ActivXpress+	N
LJLA - E106	31	F	Y	1	19-03-2021	19-03-2021	18-03-2021	TN	TaqPath	N				NP	ActivXpress+	N
LJLA - E107	32	M	Y	1	19-03-2021	19-03-2021	18-03-2021	TN	TaqPath	N				NP	ActivXpress+	N
LJLA - E108	32	F	Y	4	19-03-2021	19-03-2021	15-03-2021	TN	TaqPath	N				NP	ActivXpress+	N
LJLA - E109	24	F	Y	0	19-03-2021	19-03-2021	19-03-2021	TN	TaqPath	N				NP	ActivXpress+	N
LJLA - E110	42	M	Y	3	19-03-2021	19-03-2021	16-03-2021	TN	TaqPath	N				NP	ActivXpress+	N
LJLA - E111	46	F	Y	3	19-03-2021	19-03-2021	16-03-2021	TN	TaqPath	N				NP	ActivXpress+	N
LJLA - E112	25	F	Y	2	19-03-2021	19-03-2021	17-03-2021	TN	TaqPath	N				NP	ActivXpress+	N
LJLA - E113	25	M	Y	2	19-03-2021	19-03-2021	17-03-2021	TN	TaqPath	N				NP	ActivXpress+	N
LJLA - E114	40	F	Y	1	22-03-2021	22-03-2021	21-03-2021	TN	TaqPath	N				NP	ActivXpress+	N
LJLA - E115	34	F	Y	3	22-03-2021	22-03-2021	19-03-2021	TN	TaqPath	N				NP	ActivXpress+	N
LJLA - E116	36	F	Y	1	23-03-2021	23-03-2021	22-03-2021	TN	TaqPath	N				NP	ActivXpress+	N
LJLA - E117	46	M	Y	1	23-03-2021	23-03-2021	22-03-2021	TN	TaqPath	N				NP	ActivXpress+	N
LJLA - E118	35	F	Y	4	23-03-2021	23-03-2021	19-03-2021	TN	TaqPath	N				NP	ActivXpress+	N
LJLA - E119	43	M	Y	2	23-03-2021	23-03-2021	21-03-2021	TN	TaqPath	N				NP	ActivXpress+	N
LJLA - E120	27	M	Y	2	23-03-2021	23-03-2021	21-03-2021	TN	TaqPath	N				NP	ActivXpress+	N
LJLA - E121	26	F	Y	2	23-03-2021	23-03-2021	21-03-2021	TN	TaqPath	N				NP	ActivXpress+	N
LJLA - E122	41	M	Y	1	23-03-2021	23-03-2021	22-03-2021	TN	TaqPath	N				NP	ActivXpress+	N
LJLA - E123	39	F	Y	NA	23-03-2021	23-03-2021	NA	TN	TaqPath	N				NP	ActivXpress+	N
LJLA - E125	41	F	Y	0	24-03-2021	24-03-2021	24-03-2021	TN	TaqPath	N				NP	ActivXpress+	N
LJLA - E126	52	M	Y	2	24-03-2021	24-03-2021	22-03-2021	TN	TaqPath	N				NP	ActivXpress+	N
LJLA - E127	33	M	Y	1	24-03-2021	24-03-2021	23-03-2021	TN	TaqPath	N				NP	ActivXpress+	N
LJLA - E128	32	F	Y	1	24-03-2021	24-03-2021	23-03-2021	TN	TaqPath	N				NP	ActivXpress+	N
LJLA - E129	31	M	Y	4	24-03-2021	24-03-2021	20-03-2021	TN	TaqPath	N				NP	ActivXpress+	N
LJLA - E130	26	M	Y	2	24-03-2021	24-03-2021	22-03-2021	TN	TaqPath	N				NP	ActivXpress+	N
LJLA - E131	18	M	Y	0	25-03-2021	25-03-2021	25-03-2021	TN	TaqPath	P	19.068	20.814	32.837	NP	ActivXpress+	P
LJLA - E132	52	F	Y	3	25-03-2021	25-03-2021	22-03-2021	TN	TaqPath	P	17.733	18.28	31.474	NP	ActivXpress+	P
LJLA - E133	49	F	Y	1	25-03-2021	25-03-2021	24-03-2021	TN	TaqPath	N				NP	ActivXpress+	N
LJLA - E134	25	F	Y	4	25-03-2021	25-03-2021	21-03-2021	TN	TaqPath	N				NP	ActivXpress+	N
LJLA - E135	40	M	Y	1	25-03-2021	25-03-2021	24-03-2021	TN	TaqPath	N				NP	ActivXpress+	N
LJLA - E136	20	F	Y	3	26-03-2021	26-03-2021	23-03-2021	TN	TaqPath	N				NP	ActivXpress+	N
LJLA - E137	38	F	Y	3	26-03-2021	26-03-2021	23-03-2021	TN	TaqPath	N				NP	ActivXpress+	N
LJLA - E138	51	M	Y	8	26-03-2021	26-03-2021	18-03-2021	TN	TaqPath	N				NP	ActivXpress+	N
LJLA - E139	52	F	Y	3	26-03-2021	26-03-2021	23-03-2021	TN	TaqPath	N				NP	ActivXpress+	N
LJLA - E140	32	M	Y	2	29-03-2021	29-03-2021	27-03-2021	TN	TaqPath	N				NP	ActivXpress+	N
LJLA - E141	39	F	Y	2	29-03-2021	29-03-2021	27-03-2021	TN	TaqPath	N				NP	ActivXpress+	N
LJLA - E142	40	F	Y	2	29-03-2021	29-03-2021	27-03-2021	TN	TaqPath	N				NP	ActivXpress+	N
LJLA - E143	31	F	Y	1	29-03-2021	29-03-2021	28-03-2021	TN	TaqPath	N				NP	ActivXpress+	N
LJLA - E144	29	M	Y	1	29-03-2021	29-03-2021	28-03-2021	TN	TaqPath	N				NP	ActivXpress+	N
LJLA - E145	27	F	Y	2	30-03-2021	30-03-2021	28-03-2021	TN	TaqPath	N				NP	ActivXpress+	N
LJLA - E146	28	F	Y	0	30-03-2021	30-03-2021	30-03-2021	TN	TaqPath	N				NP	ActivXpress+	N
LJLA - E147	38	F	Y	2	30-03-2021	30-03-2021	28-03-2021	TN	TaqPath	N				NP	ActivXpress+	N
LJLA - E148	40	F	Y	2	31-03-2021	31-03-2021	29-03-2021	TN	TaqPath	N				NP	ActivXpress+	N
LJLA - E149	40	M	Y	2	31-03-2021	31-03-2021	29-03-2021	TN	TaqPath	N				NP	ActivXpress+	N
LJLA - E150	58	M	Y	5	31-03-2021	31-03-2021	26-03-2021	TN	TaqPath	N				NP	ActivXpress+	N
LJLA - E151	29	F	Y	1	01-04-2021	01-04-2021	31-03-2021	TN	TaqPath	N				NP	ActivXpress+	N
LJLA - E152	58	F	Y	12	06-04-2021	06-04-2021	25-03-2021	TN	TaqPath	N				NP	ActivXpress+	N
LJLA - E153	40	M	Y	4	06-04-2021	06-04-2021	02-04-2021	TN	TaqPath	N				NP	ActivXpress+	N
LJLA - E154	72	M	Y	3	06-04-2021	06-04-2021	03-04-2021	TN	TaqPath	N				NP	ActivXpress+	N
LJLA - E155	34	F	Y	2	06-04-2021	06-04-2021	04-04-2021	TN	TaqPath	N				NP	ActivXpress+	N
LJLA - E156	28	F	Y	8	09-04-2021	09-04-2021	01-04-2021	TN	TaqPath	N				NP	ActivXpress+	N
LJLA - E157	37	F	Y	1	09-04-2021	09-04-2021	08-04-2021	TN	TaqPath	N				NP	ActivXpress+	N
LJLA - E158	39	M	Y	2	09-04-2021	09-04-2021	07-04-2021	TN	TaqPath	N				NP	ActivXpress+	N
LJLA - E159	58	F	Y	3	09-04-2021	09-04-2021	06-04-2021	TN	TaqPath	N				NP	ActivXpress+	N
LJLA - E160	46	M	Y	2	09-04-2021	09-04-2021	07-04-2021	TN	TaqPath	N				NP	ActivXpress+	N
LJLA - E161	57	M	Y	1	12-04-2021	12-04-2021	11-04-2021	TN	TaqPath	N				NP	ActivXpress+	N
LJLA - E162	35	M	Y	1	12-04-2021	12-04-2021	11-04-2021	TN	TaqPath	N				NP	ActivXpress+	N
LJLA - E163	43	F	Y	1	12-04-2021	12-04-2021	11-04-2021	TN	TaqPath	N				NP	ActivXpress+	N
LJLA - E164	24	F	Y	1	13-04-2021	13-04-2021	12-04-2021	TN	TaqPath	N				NP	ActivXpress+	N
LJLA - E165	28	F	Y	1	13-04-2021	13-04-2021	12-04-2021	TN	TaqPath	N				NP	ActivXpress+	N
LJLA - E166	37	F	Y	2	14-04-2021	14-04-2021	12-04-2021	TN	TaqPath	N				NP	ActivXpress+	N
LJLA - E167	30	F	Y	4	15-04-2021	15-04-2021	11-04-2021	TN	TaqPath	N				NP	ActivXpress+	N
LJLA - E168	40	F	Y	1	16-04-2021	16-04-2021	15-04-2021	TN	TaqPath	N				NP	ActivXpress+	N
LJLA - E169	35	F	Y	2	19-04-2021	19-04-2021	17-04-2021	TN	TaqPath	N				NP	ActivXpress+	N
LJLA - E170	31	F	Y	1	19-04-2021	19-04-2021	18-04-2021	TN	TaqPath	N				NP	ActivXpress+	N
LJLA - E171	63	M	Y	7	19-04-2021	19-04-2021	12-04-2021	TN	TaqPath	N				NP	ActivXpress+	N
LJLA - E172	33	F	Y	2	20-04-2021	20-04-2021	18-04-2021	TN	TaqPath	N				NP	ActivXpress+	N
LJLA - E173	38	M	Y	2	20-04-2021	20-04-2021	18-04-2021	TN	TaqPath	N				NP	ActivXpress+	N
LJLA - E174	66	M	Y	1	21-04-2021	21-04-2021	20-04-2021	TN	TaqPath	N				NP	ActivXpress+	N
LJLA - E175	62	M	Y	2	21-04-2021	21-04-2021	19-04-2021	TN	TaqPath	N				NP	ActivXpress+	N
LJLA - E176	33	M	Y	3	22-04-2021	22-04-2021	19-04-2021	TN	TaqPath	N				NP	ActivXpress+	N
LJLA - E177	75	F	Y	8	23-04-2021	23-04-2021	15-04-2021	TN	TaqPath	N				NP	ActivXpress+	N
LJLA - E178	58	F	Y	2	26-04-2021	26-04-2021	24-04-2021	TN	TaqPath	N				NP	ActivXpress+	N
LJLA - E179	25	M	Y	3	27-04-2021	27-04-2021	24-04-2021	TN	TaqPath	N				NP	ActivXpress+	N
LJLA - E180	34	M	Y	2	27-04-2021	27-04-2021	25-04-2021	TN	TaqPath	N				NP	ActivXpress+	N
LJLA - E182	57	F	Y	1	28-04-2021	28-04-2021	27-04-2021	TN	TaqPath	N				NP	ActivXpress+	N
LJLA - E183	36	F	Y	3	28-04-2021	28-04-2021	25-04-2021	TN	TaqPath	N				NP	ActivXpress+	N
LJLA - E184	40	F	Y	3	28-04-2021	28-04-2021	25-04-2021	TN	TaqPath	N				NP	ActivXpress+	N
LJLA - E185	37	F	Y	2	29-04-2021	29-04-2021	27-04-2021	TN	TaqPath	N				NP	ActivXpress+	N
LJLA - E186	36	F	Y	1	29-04-2021	29-04-2021	28-04-2021	TN	TaqPath	N				NP	ActivXpress+	N
LJLA - E187	47	F	Y	1	30-04-2021	30-04-2021	29-04-2021	TN	TaqPath	N				NP	ActivXpress+	N
LJLA - E188	66	M	Y	3	30-04-2021	30-04-2021	27-04-2021	TN	TaqPath	N				NP	ActivXpress+	N
LJLA - E189	73	F	Y	4	30-04-2021	30-04-2021	26-04-2021	TN	TaqPath	N				NP	ActivXpress+	N
LJLA - E190	34	M	Y	1	04-05-2021	04-05-2021	03-05-2021	TN	TaqPath	N				NP	ActivXpress+	N
LJLA - E191	57	F	Y	3	04-05-2021	04-05-2021	01-05-2021	TN	TaqPath	N				NP	ActivXpress+	N
LJLA - E192	37	M	Y	2	04-05-2021	04-05-2021	02-05-2021	TN	TaqPath	N				NP	ActivXpress+	N
LJLA - E193	33	M	Y	7	05-05-2021	05-05-2021	28-04-2021	TN	TaqPath	N				NP	ActivXpress+	N
LJLA - E194	38	M	Y	2	05-05-2021	05-05-2021	03-05-2021	TN	TaqPath	N				NP	ActivXpress+	N
LJLA - E195	32	F	Y	2	05-05-2021	05-05-2021	03-05-2021	TN	TaqPath	N				NP	ActivXpress+	N
LJLA - E196	61	F	Y	3	06-05-2021	06-05-2021	03-05-2021	TN	TaqPath	N				NP	ActivXpress+	N
LJLA - E197	32	M	Y	3	06-05-2021	06-05-2021	03-05-2021	TN	TaqPath	P	28.667	28.128		NP	ActivXpress+	N
LJLA - E198	23	F	Y	2	06-05-2021	06-05-2021	04-05-2021	TN	TaqPath	N				NP	ActivXpress+	N
LJLA - E199	19	F	Y	2	06-05-2021	06-05-2021	04-05-2021	TN	TaqPath	N				NP	ActivXpress+	N
LJLA - E200	41	F	Y	1	07-05-2021	07-05-2021	06-05-2021	TN	TaqPath	N				NP	ActivXpress+	N
LJLA - E201	55	M	Y	2	07-05-2021	07-05-2021	05-05-2021	TN	TaqPath	N				NP	ActivXpress+	N
LJLA - E202	55	F	Y	2	07-05-2021	07-05-2021	05-05-2021	TN	TaqPath	N				NP	ActivXpress+	N
LJLA - E203	23	F	Y	2	10-05-2021	10-05-2021	08-05-2021	TN	TaqPath	N				NP	ActivXpress+	N
LJLA - E204	29	M	Y	2	10-05-2021	10-05-2021	08-05-2021	TN	TaqPath	N				NP	ActivXpress+	N
LJLA - E205	33	F	Y	1	10-05-2021	10-05-2021	09-05-2021	TN	TaqPath	N				NP	ActivXpress+	N
LJLA - E206	48	F	Y	7	10-05-2021	10-05-2021	03-05-2021	TN	TaqPath	N				NP	ActivXpress+	N
LJLA - E207	73	M	Y	89	10-05-2021	10-05-2021	10-02-2021	TN	TaqPath	N				NP	ActivXpress+	N
LJLA - E208	51	F	Y	1	11-05-2021	11-05-2021	10-05-2021	TN	TaqPath	N				NP	ActivXpress+	N
LJLA - E209	52	F	Y	10	11-05-2021	11-05-2021	01-05-2021	TN	TaqPath	N				NP	ActivXpress+	N
LJLA - E210	39	M	Y	1	12-05-2021	12-05-2021	11-05-2021	TN	TaqPath	N				NP	ActivXpress+	N
LJLA - E211	33	M	Y	2	12-05-2021	12-05-2021	10-05-2021	TN	TaqPath	N				NP	ActivXpress+	N
LJLA - E212	28	F	Y	4	12-05-2021	12-05-2021	08-05-2021	TN	TaqPath	N				NP	ActivXpress+	N
LJLA -E124	47	F	Y	2	24-03-2021	24-03-2021	22-03-2021	TN	TaqPath	N				NP	ActivXpress+	N
LJLA -E172	33	F	Y	2	20-04-2021	20-04-2021	18-04-2021	TN	TaqPath	N				NP	ActivXpress+	N
LJLA-E117	46	M	Y	1	23-03-2021	23-03-2021	22-03-2021	TN	TaqPath	N				NP	ActivXpress+	N

## Sheet: Data_site LSTM Genedia
SAMPLE_ID	AGE	SEX	SYMPTOMS_YN	SAMP_AG_COL_D	SAMP_PCR_COL_D	SYMP_ONSET_D	PCR_SPEC	PCR_NAME	PCR_RES	PCR_N_gene_CT_value	PCR_ORF1ab_CT_value	PCR_S_gene_CT_value	AG_SPEC	AG_NAME	AG_RES
LJLA - 142	26	F	Y	26-01-2021	26-01-2021	25-01-2021	TN	TaqPath	N				NP	GENEDIA W Ag	N
LJLA - 251	49	F	Y	02-02-2021	02-02-2021	31-01-2021	TN	TaqPath	N				NP	GENEDIA W Ag	N
LJLA - 001	32	F	Y	14-01-2021	14-01-2021	10-01-2021	TN	TaqPath	N				NP	GENEDIA W Ag	N
LJLA - 012	70	##USER_MISSING_97##	Y	18-01-2021	18-01-2021	18-01-2021	TN	TaqPath	P	28.227	29.486		NP	GENEDIA W Ag	N
LJLA - 037	24	M	Y	19-01-2021	19-01-2021	19-01-2021	TN	TaqPath	P	31.232	33.4	30.772	NP	GENEDIA W Ag	N
LJLA - 004	32	M	Y	15-01-2021	15-01-2021	10-01-2021	TN	TaqPath	N	31.901			NP	GENEDIA W Ag	N
LJLA - 073	67	M	Y	22-01-2021	22-01-2021	22-01-2021	TN	TaqPath	P	21.551	22.552		NP	GENEDIA W Ag	N
LJLA - 006	35	M	Y	15-01-2021	15-01-2021	15-01-2021	TN	TaqPath	N				NP	GENEDIA W Ag	N
LJLA - 007	34	F	Y	15-01-2021	15-01-2021	12-01-2021	TN	TaqPath	N				NP	GENEDIA W Ag	N
LJLA - 008	34	M	Y	15-01-2021	15-01-2021	14-01-2021	TN	TaqPath	N				NP	GENEDIA W Ag	N
LJLA - 162	60	M	Y	27-01-2021	27-01-2021	27-01-2021	TN	TaqPath	P	18.532	19.95		NP	GENEDIA W Ag	N
LJLA - 167	44	F	Y	27-01-2021	27-01-2021	27-01-2021	TN	TaqPath	P	32.548	33.265	37.553	NP	GENEDIA W Ag	N
LJLA - 011	60	##USER_MISSING_97##	Y	18-02-2021	18-02-2021	12-01-2021	TN	TaqPath	N				NP	GENEDIA W Ag	N
LJLA - 290	32	M	Y	03-02-2021	03-02-2021	03-02-2021	TN	TaqPath	P	26.989	27.574		NP	GENEDIA W Ag	N
LJLA - 013	29	##USER_MISSING_97##	Y	18-01-2021	18-01-2021	11-01-2021	TN	TaqPath	N				NP	GENEDIA W Ag	N
LJLA - 014	34	##USER_MISSING_97##	Y	18-02-2021	18-02-2021	17-01-2021	TN	TaqPath	N				NP	GENEDIA W Ag	N
LJLA - 015	41	##USER_MISSING_97##	Y	18-01-2021	18-01-2021	16-01-2021	TN	TaqPath	N				NP	GENEDIA W Ag	N
LJLA - 016	40	##USER_MISSING_97##	Y	18-01-2021	18-01-2021	15-01-2021	TN	TaqPath	N				NP	GENEDIA W Ag	N
LJLA - 017	57	##USER_MISSING_97##	Y	18-01-2021	18-01-2021	18-01-2021	TN	TaqPath	N				NP	GENEDIA W Ag	N
LJLA - 044	32	F	Y	20-01-2021	20-01-2021	20-01-2021	TN	TaqPath	P	22.161	23.39		NP	GENEDIA W Ag	P
LJLA - 331	21	M	Y	09-02-2021	09-02-2021	09-02-2021	TN	TaqPath	P	16.605	17.149	20.782	NP	GENEDIA W Ag	N
LJLA - 020	28	##USER_MISSING_97##	Y	18-01-2021	18-01-2021	17-01-2021	TN	TaqPath	N				NP	GENEDIA W Ag	N
LJLA - 021	54	M	Y	19-01-2021	19-01-2021	19-01-2021	TN	TaqPath	N				NP	GENEDIA W Ag	N
LJLA - 022	59	F	Y	19-01-2021	19-01-2021	01-01-2997	TN	TaqPath	N				NP	GENEDIA W Ag	N
LJLA - 023	65	M	Y	19-01-2021	19-01-2021	15-01-2021	TN	TaqPath	N				NP	GENEDIA W Ag	N
LJLA - 024	65	F	Y	19-02-2021	19-02-2021	13-01-2021	TN	TaqPath	N				NP	GENEDIA W Ag	N
LJLA-272	30	F	Y	03-02-2021	03-02-2021	03-02-2021	TN	TaqPath	P	26.786	27.521		NP	GENEDIA W Ag	N
LJLA - 064	35	M	Y	21-01-2021	21-01-2021	21-01-2021	TN	TaqPath	P	15.683	17.088	34.425	NP	GENEDIA W Ag	P
LJLA - 077	35	M	Y	22-01-2021	22-01-2021	22-01-2021	TN	TaqPath	P	19.095	20.08		NP	GENEDIA W Ag	P
LJLA - 028	25	M	Y	19-01-2021	19-01-2021	12-01-2021	TN	TaqPath	N				NP	GENEDIA W Ag	N
LJLA - 029	27	##USER_MISSING_97##	Y	19-01-2021	19-01-2021	18-01-2021	TN	TaqPath	N				NP	GENEDIA W Ag	N
LJLA - 030	18	F	Y	19-01-2021	19-01-2021	12-01-2021	TN	TaqPath	N				NP	GENEDIA W Ag	N
LJLA - 031	31	F	Y	19-01-2021	19-01-2021	17-01-2021	TN	TaqPath	N				NP	GENEDIA W Ag	N
LJLA - 032	21	##USER_MISSING_97##	Y	19-01-2021	19-01-2021	17-01-2021	TN	TaqPath	N				NP	GENEDIA W Ag	N
LJLA - 033	27	##USER_MISSING_97##	Y	19-01-2021	19-01-2021	18-01-2021	TN	TaqPath	N				NP	GENEDIA W Ag	N
LJLA - 034	43	F	Y	19-01-2021	19-01-2021	18-01-2021	TN	TaqPath	N				NP	GENEDIA W Ag	N
LJLA - 035	32	##USER_MISSING_97##	Y	19-01-2021	19-01-2021	18-01-2021	TN	TaqPath	N				NP	GENEDIA W Ag	N
LJLA - 036	30	F	Y	19-01-2021	19-01-2021	12-01-2021	TN	TaqPath	N				NP	GENEDIA W Ag	N
LJLA - 086	40	M	Y	22-01-2021	22-01-2021	2021-01-22	TN	TaqPath	P	18.471	20.328	20.697	NP	GENEDIA W Ag	P
LJLA - 282	46	M	Y	03-02-2021	03-02-2021	03-02-2021	TN	TaqPath	P	24.955	26.797		NP	GENEDIA W Ag	P
LJLA - 039	48	F	Y	20-01-2021	20-01-2021	19-01-2021	TN	TaqPath	N				NP	GENEDIA W Ag	N
LJLA - 040	30	F	Y	20-01-2021	20-01-2021	19-01-2021	TN	TaqPath	N				NP	GENEDIA W Ag	N
LJLA - 041	34	M	Y	20-01-2021	20-01-2021	19-01-2021	TN	TaqPath	N				NP	GENEDIA W Ag	N
LJLA - 042	47	F	Y	20-01-2021	20-01-2021	20-01-2021	TN	TaqPath	N				NP	GENEDIA W Ag	N
LJLA - 043	52	F	Y	20-01-2021	20-01-2021	18-01-2021	TN	TaqPath	N				NP	GENEDIA W Ag	N
LJLA - G379	34	M	Y	16-02-2021	16-02-2021	16-02-2021	TN	TaqPath	P	25.866	26.525	33.049	NP	GENEDIA W Ag	P
LJLA - 045	35	M	Y	20-01-2021	20-01-2021	20-01-2021	TN	TaqPath	N				NP	GENEDIA W Ag	N
LJLA - 046	74	F	Y	20-01-2021	20-01-2021	18-01-2021	TN	TaqPath	N				NP	GENEDIA W Ag	N
LJLA - 027	55	##USER_MISSING_97##	Y	19-01-2021	19-01-2021	18-01-2021	TN	TaqPath	P	16.565	18.672		NP	GENEDIA W Ag	P
LJLA - 048	38	M	Y	20-01-2021	20-01-2021	17-01-2021	TN	TaqPath	N				NP	GENEDIA W Ag	N
LJLA - 049	38	F	Y	20-01-2021	20-01-2021	18-01-2021	TN	TaqPath	N				NP	GENEDIA W Ag	N
LJLA - 061	38	M	Y	21-01-2021	21-01-2021	20-01-2021	TN	TaqPath	P	20.664	20.151	19.261	NP	GENEDIA W Ag	P
LJLA - 051	37	M	Y	20-01-2021	20-01-2021	20-01-2021	TN	TaqPath	N				NP	GENEDIA W Ag	N
LJLA - 052	31	M	Y	20-01-2021	20-01-2021	19-01-2021	TN	TaqPath	N				NP	GENEDIA W Ag	N
LJLA - 053	40	M	Y	20-01-2021	20-01-2021	17-01-2021	TN	TaqPath	N				NP	GENEDIA W Ag	N
LJLA - 054	23	M	Y	21-01-2021	21-01-2021	20-01-2021	TN	TaqPath	N				NP	GENEDIA W Ag	N
LJLA - 055	37	F	Y	21-01-2021	21-01-2021	21-01-2021	TN	TaqPath	N				NP	GENEDIA W Ag	N
LJLA - 056	59	F	Y	21-01-2021	21-01-2021	19-01-2021	TN	TaqPath	N				NP	GENEDIA W Ag	N
LJLA - 062	60	F	Y	21-01-2021	21-01-2021	20-01-2021	TN	TaqPath	P	16.831	17.656	26.447	NP	GENEDIA W Ag	P
LJLA - 026	39	F	Y	19-01-2021	19-01-2021	18-01-2021	TN	TaqPath	P	23. 99	24.446		NP	GENEDIA W Ag	N
LJLA - 059	29	M	Y	21-01-2021	21-01-2021	19-01-2021	TN	TaqPath	N				NP	GENEDIA W Ag	N
LJLA - 079	39	M	Y	22-01-2021	22-01-2021	21-01-2021	TN	TaqPath	P	31. 73	31.949		NP	GENEDIA W Ag	N
LJLA - 078	21	M	Y	22-01-2021	22-01-2021	21-01-2021	TN	TaqPath	P	21.911	22.652		NP	GENEDIA W Ag	P
LJLA - 083	54	F	Y	22-01-2021	22-01-2021	21-01-2021	TN	TaqPath	P				NP	GENEDIA W Ag	N
LJLA - 063	26	F	Y	21-01-2021	21-01-2021	19-01-2021	TN	TaqPath	N	27.61			NP	GENEDIA W Ag	N
LJLA - 088	54	F	Y	22-01-2021	22-01-2021	21-01-2021	TN	TaqPath	P	19.869	20.697		NP	GENEDIA W Ag	N
LJLA - 065	53	F	Y	21-01-2021	21-01-2021	18-01-2021	TN	TaqPath	N				NP	GENEDIA W Ag	N
LJLA - 066	35	M	Y	21-01-2021	21-01-2021	17-01-2021	TN	TaqPath	N				NP	GENEDIA W Ag	N
LJLA - 067	35	F	Y	21-01-2021	21-01-2021	19-01-2021	TN	TaqPath	N				NP	GENEDIA W Ag	N
LJLA - 068	23	F	Y	21-01-2021	21-01-2021	19-01-2021	TN	TaqPath	N				NP	GENEDIA W Ag	N
LJLA - 129	28	M	Y	26-01-2021	26-01-2021	25-01-2021	TN	TaqPath	P	26.751	27.297		NP	GENEDIA W Ag	N
LJLA - 070	64	F	Y	22-01-2021	22-01-2021	21-01-2021	TN	TaqPath	N				NP	GENEDIA W Ag	N
LJLA - 176	52	M	Y	28-01-2021	28-01-2021	27-01-2021	TN	TaqPath	P	19.667	20.071		NP	GENEDIA W Ag	N
LJLA - 072	49	M	Y	22-01-2021	22-01-2021	22-01-2021	TN	TaqPath	N				NP	GENEDIA W Ag	N
LJLA - 202	48	M	Y	29-01-2021	29-01-2021	28-01-2021	TN	TaqPath	P	21.642	22.758	35.415	NP	GENEDIA W Ag	N
LJLA - 074	25	F	Y	22-01-2021	22-01-2021	01-01-2997	TN	TaqPath	N				NP	GENEDIA W Ag	N
LJLA - 075	52	F	Y	22-01-2021	22-01-2021	01-01-2997	TN	TaqPath	N				NP	GENEDIA W Ag	N
LJLA - 076	38	F	Y	22-01-2021	22-01-2021	21-01-2021	TN	TaqPath	N				NP	GENEDIA W Ag	N
LJLA - 254	61	M	Y	02-02-2021	02-02-2021	01-02-2021	TN	TaqPath	P	25.69	26.219		NP	GENEDIA W Ag	N
LJLA - 338	54	F	Y	09-02-2021	09-02-2021	08-02-2021	TN	TaqPath	P	20.565	21.286	25.617	NP	GENEDIA W Ag	N
LJLA - G294	47	F	Y	04-02-2021	04-02-2021	03-02-2021	TN	TaqPath	P	35.034	38.45		NP	GENEDIA W Ag	N
LJLA - G306	33	M	Y	04-02-2021	04-02-2021	03-02-2021	TN	TaqPath	P	34.031	37.245		NP	GENEDIA W Ag	N
LJLA - 081	31	F	Y	22-01-2021	22-01-2021	18-01-2021	TN	TaqPath	N				NP	GENEDIA W Ag	N
LJLA - 082	62	M	Y	22-01-2021	22-01-2021	08-01-2021	TN	TaqPath	N				NP	GENEDIA W Ag	N
LJLA - G322	49	M	Y	10-02-2021	10-02-2021	09-02-2021	TN	TaqPath	P	24.947	25.894	39.243	NP	GENEDIA W Ag	N
LJLA - 084	24	F	Y	22-01-2021	22-01-2021	21-01-2021	TN	TaqPath	N				NP	GENEDIA W Ag	N
LJLA - 085	33	F	Y	22-01-2021	22-01-2021	20-01-2021	TN	TaqPath	N				NP	GENEDIA W Ag	N
LJLA - 178	56	F	Y	28-01-2021	28-01-2021	27-01-2021	TN	TaqPath	P	20.499	19.8 9	19.121	NP	GENEDIA W Ag	P
LJLA - 087	67	F	Y	22-01-2021	22-01-2021	21-01-2021	TN	TaqPath	N				NP	GENEDIA W Ag	N
LJLA - G394	38	F	Y	18-02-2021	18-02-2021	17-02-2021	TN	TaqPath	P	25.731	27.2 6		NP	GENEDIA W Ag	N
LJLA - 089	46	F	Y	22-01-2021	22-01-2021	22-01-2021	TN	TaqPath	N				NP	GENEDIA W Ag	N
LJLA - 090	40	F	Y	22-01-2021	22-01-2021	19-01-2021	TN	TaqPath	N				NP	GENEDIA W Ag	N
LJLA - 091	40	F	Y	22-01-2021	22-01-2021	20-01-2021	TN	TaqPath	N				NP	GENEDIA W Ag	N
LJLA-267	30	F	Y	03-02-2021	03-02-2021	02-02-2021	TN	TaqPath	P	27.734	28.116	35.031	NP	GENEDIA W Ag	N
LJLA - 093	38	M	Y	22-01-2021	22-01-2021	22-01-2021	TN	TaqPath	N				NP	GENEDIA W Ag	N
LJLA - 284	42	F	Y	03-02-2021	03-02-2021	02-02-2021	TN	TaqPath	P	15.29	15.7 2	27.062	NP	GENEDIA W Ag	P
LJLA - G358	30	M	Y	11-02-2021	11-02-2021	10-02-2021	TN	TaqPath	P	30.16	31.7 3		NP	GENEDIA W Ag	P
LJLA-231	58	F	Y	01-02-2021	01-02-2021	31-01-2021	TN	TaqPath	P	16.254	16.563	20.569	NP	GENEDIA W Ag	P
LJLA - 097	31	M	Y	25-01-2021	25-01-2021	23-01-2021	TN	TaqPath	N				NP	GENEDIA W Ag	N
LJLA - 098	40	F	Y	25-01-2021	25-01-2021	24-01-2021	TN	TaqPath	N				NP	GENEDIA W Ag	N
LJLA - 099	25	M	Y	25-01-2021	25-01-2021	24-01-2021	TN	TaqPath	N				NP	GENEDIA W Ag	N
LJLA - 115	59	F	Y	26-01-2021	26-01-2021	23-01-2021	TN	TaqPath	N				NP	GENEDIA W Ag	N
LJLA - 116	68	M	Y	26-01-2021	26-01-2021	26-01-2021	TN	TaqPath	N				NP	GENEDIA W Ag	N
LJLA - 003	34	F	Y	15-01-2021	15-01-2021	13-01-2021	TN	TaqPath	P	21.716	21.562	20.829	NP	GENEDIA W Ag	P
LJLA - 118	47	F	Y	26-01-2021	26-01-2021	19-01-2021	TN	TaqPath	N				NP	GENEDIA W Ag	N
LJLA - 119	66	F	Y	26-01-2021	26-01-2021	24-01-2021	TN	TaqPath	N				NP	GENEDIA W Ag	N
LJLA - 120	68	M	Y	26-01-2021	26-01-2021	25-01-2021	TN	TaqPath	N				NP	GENEDIA W Ag	N
LJLA - 121	32	F	Y	26-01-2021	26-01-2021	26-01-2021	TN	TaqPath	N				NP	GENEDIA W Ag	N
LJLA - 122	32	F	Y	26-01-2021	26-01-2021		TN	TaqPath	N				NP	GENEDIA W Ag	N
LJLA - 123	40	M	Y	26-01-2021	26-01-2021	23-01-2021	TN	TaqPath	N				NP	GENEDIA W Ag	N
LJLA - 124	40	F	Y	26-01-2021	26-01-2021	24-01-2021	TN	TaqPath	N				NP	GENEDIA W Ag	N
LJLA - 125	43	M	Y	26-01-2021	26-01-2021	26-01-2021	TN	TaqPath	N				NP	GENEDIA W Ag	N
LJLA - 126	48	M	Y	26-01-2021	26-01-2021	25-01-2021	TN	TaqPath	N				NP	GENEDIA W Ag	N
LJLA - 127	50	F	Y	26-01-2021	26-01-2021	25-01-2021	TN	TaqPath	N				NP	GENEDIA W Ag	N
LJLA - 128	29	F	Y	26-01-2021	26-01-2021	25-01-2021	TN	TaqPath	N				NP	GENEDIA W Ag	P
LJLA - 005	51	F	Y	2021-01-15	2021-01-15	13-01-2021	TN	TaqPath	P	20.043	21.973		NP	GENEDIA W Ag	P
LJLA - 130	58	F	Y	26-01-2021	26-01-2021	20-01-2021	TN	TaqPath	N				NP	GENEDIA W Ag	N
LJLA - 060	24	F	Y	21-01-2021	21-01-2021	19-01-2021	TN	TaqPath	P	26.266	26.249	25.439	NP	GENEDIA W Ag	P
LJLA - 132	21	F	Y	02-01-2021	02-01-2021	26-01-2021	TN	TaqPath	N				NP	GENEDIA W Ag	N
LJLA - 133	30	F	Y	26-01-2021	26-01-2021	25-01-2021	TN	TaqPath	N				NP	GENEDIA W Ag	N
LJLA - 134	22	M	Y	26-01-2021	26-01-2021	22-01-2021	TN	TaqPath	N				NP	GENEDIA W Ag	N
LJLA - 080	33	F	Y	22-01-2021	22-01-2021	20-01-2021	TN	TaqPath	P	19.068	19.938		NP	GENEDIA W Ag	P
LJLA - 136	37	F	Y	26-01-2021	26-01-2021	23-01-2021	TN	TaqPath	N				NP	GENEDIA W Ag	N
LJLA - 137	47	F	Y	26-01-2021	26-01-2021	25-01-2021	TN	TaqPath	N				NP	GENEDIA W Ag	N
LJLA - 138	52	M	Y	26-01-2021	26-01-2021	25-01-2021	TN	TaqPath	N				NP	GENEDIA W Ag	N
LJLA - 139	56	M	Y	26-01-2021	26-01-2021	25-01-2021	TN	TaqPath	N				NP	GENEDIA W Ag	N
LJLA - 140	47	F	Y	26-01-2021	26-01-2021	25-01-2021	TN	TaqPath	N				NP	GENEDIA W Ag	N
LJLA - 141	23	F	Y	26-01-2021	26-01-2021	25-01-2021	TN	TaqPath	N				NP	GENEDIA W Ag	N
LJLA - 142	26	F	Y	26-02-2021	26-02-2021	25-01-2021	TN	TaqPath	N				NP	GENEDIA W Ag	N
LJLA - 143	38	F	Y	26-01-2021	26-01-2021	24-01-2021	TN	TaqPath	N				NP	GENEDIA W Ag	N
LJLA - 144	45	M	Y	26-01-2021	26-01-2021	24-01-2021	TN	TaqPath	N				NP	GENEDIA W Ag	N
LJLA - 145	55	M	Y	27-01-2021	27-01-2021	26-01-2021	TN	TaqPath	N				NP	GENEDIA W Ag	N
LJLA - 095	41	M	Y	25-01-2021	25-01-2021	23-01-2021	TN	TaqPath	P	17.942	20.107		NP	GENEDIA W Ag	P
LJLA - 147	19	F	Y	27-01-2021	27-01-2021	26-01-2021	TN	TaqPath	N				NP	GENEDIA W Ag	N
LJLA - 148	35	F	Y	27-01-2021	27-01-2021	25-01-2021	TN	TaqPath	N				NP	GENEDIA W Ag	N
LJLA - 149	25	F	Y	27-01-2021	27-01-2021	24-01-2021	TN	TaqPath	N				NP	GENEDIA W Ag	N
LJLA - 150	22	F	Y	27-01-2021	27-01-2021	25-01-2021	TN	TaqPath	N				NP	GENEDIA W Ag	N
LJLA - 151	26	M	Y	27-01-2021	27-01-2021	20-01-2021	TN	TaqPath	N				NP	GENEDIA W Ag	N
LJLA - 096	65	M	Y	25-01-2021	25-01-2021	23-01-2021	TN	TaqPath	P	20.001	19. 81	27.719	NP	GENEDIA W Ag	P
LJLA - 153	46	M	Y	27-01-2021	27-01-2021	25-01-2021	TN	TaqPath	N				NP	GENEDIA W Ag	N
LJLA - 154	48	M	Y	27-01-2021	27-01-2021	24-01-2021	TN	TaqPath	N				NP	GENEDIA W Ag	N
LJLA - 155	38	F	Y	27-01-2021	27-01-2021	27-01-2021	TN	TaqPath	N				NP	GENEDIA W Ag	N
LJLA - 156	38	M	Y	27-01-2021	27-01-2021	27-01-2021	TN	TaqPath	N				NP	GENEDIA W Ag	N
LJLA - 157	46	M	Y	27-01-2021	27-01-2021	21-01-2021	TN	TaqPath	N				NP	GENEDIA W Ag	N
LJLA - 158	33	F	Y	27-01-2021	27-01-2021	27-01-2021	TN	TaqPath	N				NP	GENEDIA W Ag	N
LJLA - 159	38	F	Y	27-01-2021	27-01-2021	26-01-2021	TN	TaqPath	N				NP	GENEDIA W Ag	N
LJLA - 131	40	F	Y	26-01-2021	26-01-2021	24-01-2021	TN	TaqPath	P	22.376	22.784	29.838	NP	GENEDIA W Ag	P
LJLA - 161	59	F	Y	27-01-2021	27-01-2021	27-01-2021	TN	TaqPath	N				NP	GENEDIA W Ag	N
LJLA - 135	23	F	Y	26-01-2021	26-01-2021	24-01-2021	TN	TaqPath	P	22.49	22.985	39.932	NP	GENEDIA W Ag	P
LJLA - 163	27	F	Y	27-01-2021	27-01-2021	27-01-2021	TN	TaqPath	N				NP	GENEDIA W Ag	N
LJLA - 164	23	M	Y	27-01-2021	27-01-2021	26-01-2021	TN	TaqPath	N				NP	GENEDIA W Ag	N
LJLA - 165	24	M	Y	27-01-2021	27-01-2021	26-01-2021	TN	TaqPath	N				NP	GENEDIA W Ag	N
LJLA - 166	25	M	Y	27-01-2021	27-01-2021	20-01-2021	TN	TaqPath	N				NP	GENEDIA W Ag	N
LJLA - 192	18	M	Y	29-01-2021	29-01-2021	27-01-2021	TN	TaqPath	P	24.977	26.435		NP	GENEDIA W Ag	P
LJLA - 168	52	F	Y	27-01-2021	27-01-2021	27-01-2021	TN	TaqPath	N				NP	GENEDIA W Ag	N
LJLA - 169	54	M	Y	27-01-2021	27-01-2021	27-01-2021	TN	TaqPath	N				NP	GENEDIA W Ag	N
LJLA - 170	50	F	Y	28-01-2021	28-01-2021	28-01-2021	TN	TaqPath	N				NP	GENEDIA W Ag	N
LJLA - 171	54	F	Y	28-01-2021	28-01-2021	27-01-2021	TN	TaqPath	N				NP	GENEDIA W Ag	N
LJLA - 172	48	M	Y	28-01-2021	28-01-2021	26-01-2021	TN	TaqPath	N				NP	GENEDIA W Ag	N
LJLA - 173	36	F	Y	28-01-2021	28-01-2021	27-01-2021	TN	TaqPath	P	17.554	18.078		NP	GENEDIA W Ag	P
LJLA - 174	54	M	Y	28-01-2021	28-01-2021	28-01-2021	TN	TaqPath	N				NP	GENEDIA W Ag	N
LJLA - 175	63	F	Y	28-01-2021	28-01-2021	25-01-2021	TN	TaqPath	N				NP	GENEDIA W Ag	N
LJLA - 018	63	##USER_MISSING_97##	Y	18-01-2021	18-01-2021	16-01-2021	TN	TaqPath	P	25.491	25.672	24.745	NP	GENEDIA W Ag	N
LJLA - 177	66	F	Y	28-01-2021	28-01-2021	27-01-2021	TN	TaqPath	N				NP	GENEDIA W Ag	N
LJLA - 050	61	F	Y	20-01-2021	20-01-2021	18-01-2021	TN	TaqPath	P	22.519	23.311		NP	GENEDIA W Ag	N
LJLA - 179	40	F	Y	28-01-2021	28-01-2021	27-01-2021	TN	TaqPath	N				NP	GENEDIA W Ag	N
LJLA - 200	72	M	Y	29-01-2021	29-01-2021	27-01-2021	TN	TaqPath	P	18.524	19.036	26.639	NP	GENEDIA W Ag	N
LJLA - 252	45	M	Y	02-02-2021	02-02-2021	31-01-2021	TN	TaqPath	P	27.915	28.4		NP	GENEDIA W Ag	N
LJLA - 182	51	F	Y	28-01-2021	28-01-2021	15-01-2021	TN	TaqPath	N				NP	GENEDIA W Ag	N
LJLA - 183	23	F	Y	28-01-2021	28-01-2021	25-01-2021	TN	TaqPath	N				NP	GENEDIA W Ag	N
LJLA - 184	32	M	Y	28-01-2021	28-01-2021	23-01-2021	TN	TaqPath	Indeterminate		16.263		NP	GENEDIA W Ag	N
LJLA - 185	59	F	Y	28-01-2021	28-01-2021	26-01-2021	TN	TaqPath	N				NP	GENEDIA W Ag	N
LJLA - 186	34	M	Y	28-01-2021	28-01-2021	28-01-2021	TN	TaqPath	Indeterminate	32.582			NP	GENEDIA W Ag	N
LJLA - 187	28	F	Y	28-01-2021	28-01-2021	27-01-2021	TN	TaqPath	N				NP	GENEDIA W Ag	N
LJLA - 188	30	M	Y	28-01-2021	28-01-2021	27-01-2021	TN	TaqPath	N				NP	GENEDIA W Ag	N
LJLA - 189	54	F	Y	28-01-2021	28-01-2021	28-01-2021	TN	TaqPath	N				NP	GENEDIA W Ag	N
LJLA - 190	37	F	Y	28-01-2021	28-01-2021	27-01-2021	TN	TaqPath	N				NP	GENEDIA W Ag	N
LJLA - 191	73	M	Y	29-01-2021	29-01-2021	29-01-2021	TN	TaqPath	N				NP	GENEDIA W Ag	N
LJLA - 280	60	F	Y	03-02-2021	03-02-2021	01-02-2021	TN	TaqPath	P	21.091	22.353	35.268	NP	GENEDIA W Ag	N
LJLA - 193	38	F	Y	29-01-2021	29-01-2021	28-01-2021	TN	TaqPath	N				NP	GENEDIA W Ag	N
LJLA - 327	31	M	Y	09-02-2021	09-02-2021	07-02-2021	TN	TaqPath	P	32.242	33.207		NP	GENEDIA W Ag	N
LJLA - 195	47	F	Y	29-01-2021	29-01-2021	28-01-2021	TN	TaqPath	N				NP	GENEDIA W Ag	N
LJLA - 196	21	M	Y	29-01-2021	29-01-2021	25-01-2021	TN	TaqPath	N				NP	GENEDIA W Ag	N
LJLA - 197	23	M	Y	29-01-2021	29-01-2021	27-01-2021	TN	TaqPath	N				NP	GENEDIA W Ag	N
LJLA - 198	43	M	Y	29-01-2021	29-01-2021	27-01-2021	TN	TaqPath	N				NP	GENEDIA W Ag	N
LJLA - 199	34	F	Y	29-01-2021	29-01-2021	28-01-2021	TN	TaqPath	N				NP	GENEDIA W Ag	N
LJLA - 277	24	F	Y	03-02-2021	03-02-2021	01-02-2021	TN	TaqPath	P	18.693	19.389		NP	GENEDIA W Ag	P
LJLA - 201	54	F	Y	29-01-2021	29-01-2021	27-01-2021	TN	TaqPath	N				NP	GENEDIA W Ag	N
LJLA - G341	39	F	Y	10-02-2021	10-02-2021	08-02-2021	TN	TaqPath	P	20.227	21.211	21.327	NP	GENEDIA W Ag	P
LJLA - 203	37	M	Y	29-01-2021	29-01-2021	27-01-2021	TN	TaqPath	N				NP	GENEDIA W Ag	N
LJLA - 204	28	F	Y	29-01-2021	29-01-2021	29-01-2021	TN	TaqPath	N				NP	GENEDIA W Ag	N
LJLA - 205	69	M	Y	29-01-2021	29-01-2021	29-01-2021	TN	TaqPath	N				NP	GENEDIA W Ag	N
LJLA - G374	60	M	Y	15-02-2021	15-02-2021	13-02-2021	TN	TaqPath	P	19.175	2 .789	19.891	NP	GENEDIA W Ag	P
LJLA - 207	26	F	Y	29-01-2021	29-01-2021	28-01-2021	TN	TaqPath	N				NP	GENEDIA W Ag	N
LJLA - 208	30	F	Y	29-01-2021	29-01-2021	29-01-2021	TN	TaqPath	N				NP	GENEDIA W Ag	N
LJLA - 209	73	F	Y	29-01-2021	29-01-2021	28-01-2021	TN	TaqPath	N				NP	GENEDIA W Ag	N
LJLA - 210	26	F	Y	29-01-2021	29-01-2021	28-01-2021	TN	TaqPath	N				NP	GENEDIA W Ag	N
LJLA - 211	34	F	Y	29-01-2021	29-01-2021	28-01-2021	TN	TaqPath	N				NP	GENEDIA W Ag	N
LJLA - 212	42	M	Y	29-01-2021	29-01-2021	28-01-2021	TN	TaqPath	N				NP	GENEDIA W Ag	N
LJLA - G386	24	M	Y	17-02-2021	17-02-2021	15-02-2021	TN	TaqPath	P	21.44	21.589	22.637	NP	GENEDIA W Ag	P
LJLA - 214	47	M	Y	29-01-2021	29-01-2021	20-01-2021	TN	TaqPath	N				NP	GENEDIA W Ag	N
LJLA - 215	25	F	Y	29-01-2021	29-01-2021	29-01-2021	TN	TaqPath	N				NP	GENEDIA W Ag	N
LJLA - 216	21	F	Y	29-01-2021	29-01-2021	29-01-2021	TN	TaqPath	N				NP	GENEDIA W Ag	N
LJLA - 217	35	F	Y	29-01-2021	29-01-2021	28-01-2021	TN	TaqPath	N				NP	GENEDIA W Ag	N
LJLA - 218	21	F	Y	29-01-2021	29-01-2021	27-01-2021	TN	TaqPath	N				NP	GENEDIA W Ag	N
LJLA - 219	51	M	Y	29-01-2021	29-01-2021	26-01-2021	TN	TaqPath	N				NP	GENEDIA W Ag	N
LJLA - 220	72	M	Y	29-01-2021	29-01-2021	27-01-2021	TN	TaqPath	N				NP	GENEDIA W Ag	N
LJLA - 237	46	M	Y	02-02-2021	02-02-2021	01-02-2021	TN	TaqPath	N				NP	GENEDIA W Ag	N
LJLA - 238	56	F	Y	02-02-2021	02-02-2021	01-02-2021	TN	TaqPath	N				NP	GENEDIA W Ag	N
LJLA - 239	49	F	Y	02-02-2021	02-02-2021	28-01-2021	TN	TaqPath	N				NP	GENEDIA W Ag	N
LJLA - 240	50	M	Y	02-02-2021	02-02-2021	29-01-2021	TN	TaqPath	N				NP	GENEDIA W Ag	N
LJLA - 241	80	M	Y	02-02-2021	02-02-2021	01-02-2021	TN	TaqPath	N				NP	GENEDIA W Ag	N
LJLA-234	56	F	Y	01-02-2021	01-02-2021	30-01-2021	TN	TaqPath	P	19.185	19.692	26.588	NP	GENEDIA W Ag	P
LJLA - 019	49	##USER_MISSING_97##	Y	18-01-2021	18-01-2021	15-01-2021	TN	TaqPath	P	25.615	25.755	25.2 9	NP	GENEDIA W Ag	P
LJLA - 244	49	F	Y	02-02-2021	02-02-2021	02-02-2021	TN	TaqPath	N				NP	GENEDIA W Ag	N
LJLA - 245	52	F	Y	02-02-2021	02-02-2021	02-02-2021	TN	TaqPath	N				NP	GENEDIA W Ag	N
LJLA - 246	28	F	Y	02-02-2021	02-02-2021	01-02-2021	TN	TaqPath	N				NP	GENEDIA W Ag	N
LJLA - 247	28	M	Y	02-02-2021	02-02-2021	01-02-2021	TN	TaqPath	N				NP	GENEDIA W Ag	N
LJLA - 248	29	F	Y	02-02-2021	02-02-2021	31-01-2021	TN	TaqPath	N				NP	GENEDIA W Ag	N
LJLA - 249	45	F	Y	02-02-2021	02-02-2021	14-01-2021	TN	TaqPath	P	37.853			NP	GENEDIA W Ag	N
LJLA - 250	20	F	Y	02-02-2021	02-02-2021	30-01-2021	TN	TaqPath	N				NP	GENEDIA W Ag	N
LJLA - 251	49	F	Y	02-02-2021	02-02-2021	21-01-2021	TN	TaqPath	N				NP	GENEDIA W Ag	N
LJLA - 047	40	M	Y	20-01-2021	20-01-2021	17-01-2021	TN	TaqPath	P	18.382	19.81	27.262	NP	GENEDIA W Ag	P
LJLA - 253	32	F	Y	02-02-2021	02-02-2021	01-02-2021	TN	TaqPath	N				NP	GENEDIA W Ag	N
LJLA - 071	55	F	Y	22-01-2021	22-01-2021	2021-01-19	TN	TaqPath	P	14.1 2	15.466	29.162	NP	GENEDIA W Ag	P
LJLA - 255	30	F	Y	02-02-2021	02-02-2021	02-02-2021	TN	TaqPath	N				NP	GENEDIA W Ag	N
LJLA - 256	44	F	Y	02-02-2021	02-02-2021	01-02-2021	TN	TaqPath	N				NP	GENEDIA W Ag	N
LJLA - 257	65	M	Y	02-02-2021	02-02-2021	02-02-2021	TN	TaqPath	N				NP	GENEDIA W Ag	N
LJLA - 258	26	M	Y	02-02-2021	02-02-2021	02-02-2021	TN	TaqPath	N				NP	GENEDIA W Ag	N
LJLA - 259	57	M	Y	02-02-2021	02-02-2021	02-02-2021	TN	TaqPath	N				NP	GENEDIA W Ag	N
LJLA - 260	39	M	Y	02-02-2021	02-02-2021	28-01-2021	TN	TaqPath	N				NP	GENEDIA W Ag	N
LJLA - 261	39	F	Y	02-02-2021	02-02-2021	01-02-2021	TN	TaqPath	N				NP	GENEDIA W Ag	N
LJLA - 262	38	M	Y	02-02-2021	02-02-2021	01-02-2021	TN	TaqPath	N				NP	GENEDIA W Ag	N
LJLA - 117	25	F	Y	26-01-2021	26-01-2021	23-01-2021	TN	TaqPath	P	15. 36	16.545	24.919	NP	GENEDIA W Ag	P
LJLA - 278	58	F	Y	03-02-2021	03-02-2021	02-02-2021	TN	TaqPath	N				NP	GENEDIA W Ag	N
LJLA - 279	62	M	Y	03-02-2021	03-02-2021	02-02-2021	TN	TaqPath	N				NP	GENEDIA W Ag	N
LJLA - 206	24	F	Y	29-01-2021	29-01-2021	26-01-2021	TN	TaqPath	P	21.365	21.8 2	30.674	NP	GENEDIA W Ag	P
LJLA - 281	49	F	Y	03-02-2021	03-02-2021	01-02-2021	TN	TaqPath	N				NP	GENEDIA W Ag	N
LJLA - 213	41	F	Y	29-01-2021	29-01-2021	26-01-2021	TN	TaqPath	P	19.142	19.847	38.89	NP	GENEDIA W Ag	P
LJLA - 283	24	M	Y	03-02-2021	03-02-2021	31-01-2021	TN	TaqPath	N				NP	GENEDIA W Ag	N
LJLA - 025	60	M	Y	19-01-2021	19-01-2021	16-01-2021	TN	TaqPath	P	19.34	20.831		NP	GENEDIA W Ag	N
LJLA - 285	42	F	Y	03-02-2021	03-02-2021	01-02-2021	TN	TaqPath	N				NP	GENEDIA W Ag	N
LJLA - 286	60	M	Y	03-02-2021	03-02-2021	30-01-2021	TN	TaqPath	Indeterminate	38.586			NP	GENEDIA W Ag	N
LJLA - 287	58	F	Y	03-02-2021	03-02-2021	31-01-2021	TN	TaqPath	N				NP	GENEDIA W Ag	N
LJLA - 288	61	F	Y	03-02-2021	03-02-2021	31-01-2021	TN	TaqPath	N				NP	GENEDIA W Ag	N
LJLA - 289	23	F	Y	03-02-2021	03-02-2021	03-01-2021	TN	TaqPath	N				NP	GENEDIA W Ag	N
LJLA - 038	20	F	Y	19-01-2021	19-01-2021	16-01-2021	TN	TaqPath	P	20.952	21.491		NP	GENEDIA W Ag	N
LJLA - 291	30	F	Y	03-02-2021	03-02-2021	03-02-2021	TN	TaqPath	N				NP	GENEDIA W Ag	N
LJLA - 292	32	M	Y	03-02-2021	03-02-2021	02-02-2021	TN	TaqPath	N				NP	GENEDIA W Ag	N
LJLA - 293	47	M	Y	03-02-2021	03-02-2021	27-01-2021	TN	TaqPath	N				NP	GENEDIA W Ag	N
LJLA - 294	52	F	Y	03-02-2021	03-02-2021	02-02-2021	TN	TaqPath	N				NP	GENEDIA W Ag	N
LJLA - 295	38	F	Y	03-02-2021	03-02-2021	03-02-2021	TN	TaqPath	N				NP	GENEDIA W Ag	N
LJLA - 296	59	F	Y	03-02-2021	03-02-2021	05-01-2021	TN	TaqPath	N				NP	GENEDIA W Ag	N
LJLA - 297	29	F	Y	03-02-2021	03-02-2021	01-02-2021	TN	TaqPath	N				NP	GENEDIA W Ag	N
LJLA - 298	26	F	Y	03-02-2021	03-02-2021	01-02-2021	TN	TaqPath	N				NP	GENEDIA W Ag	N
LJLA - 299	68	M	Y	03-02-2021	03-02-2021	02-02-2021	TN	TaqPath	N				NP	GENEDIA W Ag	N
LJLA - 300	20	F	Y	03-02-2021	03-02-2021	03-02-2021	TN	TaqPath	N				NP	GENEDIA W Ag	N
LJLA - 301	24	M	Y	03-02-2021	03-02-2021	25-01-2021	TN	TaqPath	N				NP	GENEDIA W Ag	N
LJLA - 302	28	M	Y	03-02-2021	03-02-2021	01-02-2021	TN	TaqPath	N				NP	GENEDIA W Ag	N
LJLA - 326	31	F	Y	09-02-2021	09-02-2021	07-02-2021	TN	TaqPath	N				NP	GENEDIA W Ag	N
LJLA - 058	49	F	Y	21-01-2021	21-01-2021	18-01-2021	TN	TaqPath	P	30.978	32.335		NP	GENEDIA W Ag	N
LJLA - 328	67	F	Y	09-02-2021	09-02-2021	05-02-2021	TN	TaqPath	N				NP	GENEDIA W Ag	N
LJLA - 329	21	M	Y	09-02-2021	09-02-2021	07-02-2021	TN	TaqPath	N				NP	GENEDIA W Ag	N
LJLA - 330	44	M	Y	09-02-2021	09-02-2021	06-02-2021	TN	TaqPath	N				NP	GENEDIA W Ag	N
LJLA - 152	46	F	Y	27-01-2021	27-01-2021	24-01-2021	TN	TaqPath	P	26.786	26.796	26.369	NP	GENEDIA W Ag	N
LJLA - 332	40	M	Y	09-02-2021	09-02-2021	08-02-2021	TN	TaqPath	N				NP	GENEDIA W Ag	N
LJLA - 333	65	M	Y	09-02-2021	09-02-2021	05-02-2021	TN	TaqPath	N				NP	GENEDIA W Ag	N
LJLA - 334	64	F	Y	09-02-2021	09-02-2021	07-02-2021	TN	TaqPath	N				NP	GENEDIA W Ag	N
LJLA - 335	27	F	Y	09-02-2021	09-02-2021	09-02-2021	TN	TaqPath	N				NP	GENEDIA W Ag	N
LJLA - 336	68	M	Y	09-02-2021	09-02-2021	01-02-2021	TN	TaqPath	N				NP	GENEDIA W Ag	N
LJLA - 337	59	F	Y	09-02-2021	09-02-2021	08-02-2021	TN	TaqPath	N				NP	GENEDIA W Ag	N
LJLA - 160	24	M	Y	27-01-2021	27-01-2021	24-01-2021	TN	TaqPath	P	29.598	30.342		NP	GENEDIA W Ag	N
LJLA - 349	21	F	Y	11-02-2021	11-02-2021	10-02-2021	TN	TaqPath	N				NP	GENEDIA W Ag	N
LJLA - 350	48	F	Y	11-02-2021	11-02-2021	10-02-2021	TN	TaqPath	N	38. 91			NP	GENEDIA W Ag	N
LJLA - 351	36	F	Y	11-02-2021	11-02-2021	08-02-2021	TN	TaqPath	N				NP	GENEDIA W Ag	N
LJLA - G288	40	F	Y	04-02-2021	04-02-2021	03-02-2021	TN	TaqPath	N				NP	GENEDIA W Ag	N
LJLA - G289	67	F	Y	04-02-2021	04-02-2021	03-02-2021	TN	TaqPath	N				NP	GENEDIA W Ag	N
LJLA - G290	51	M	Y	04-02-2021	04-02-2021	31-01-2021	TN	TaqPath	N				NP	GENEDIA W Ag	N
LJLA - G291	33	F	Y	04-02-2021	04-02-2021	03-02-2021	TN	TaqPath	N		25.118		NP	GENEDIA W Ag	N
LJLA - 194	57	F	Y	29-01-2021	29-01-2021	26-01-2021	TN	TaqPath	P	17. 59	12.7 5		NP	GENEDIA W Ag	N
LJLA - G396	41	F	Y	19-02-2021	19-02-2021	16-02-2021	TN	TaqPath	P	23.933	25. 58	21.749	NP	GENEDIA W Ag	P
LJLA-230	40	M	Y	01-02-2021	01-02-2021	29-01-2021	TN	TaqPath	P	16.566	17.744	26.126	NP	GENEDIA W Ag	P
LJLA - G295	42	M	Y	04-02-2021	04-02-2021	02-02-2021	TN	TaqPath	N		23.23		NP	GENEDIA W Ag	N
LJLA - G296	25	F	Y	04-02-2021	04-02-2021	03-02-2021	TN	TaqPath	N				NP	GENEDIA W Ag	N
LJLA - G297	29	M	Y	04-02-2021	04-02-2021	02-02-2021	TN	TaqPath	N				NP	GENEDIA W Ag	N
LJLA - G298	27	F	Y	04-02-2021	04-02-2021	03-02-2021	TN	TaqPath	N				NP	GENEDIA W Ag	N
LJLA - G299	68	F	Y	04-02-2021	04-02-2021	30-01-2021	TN	TaqPath	N				NP	GENEDIA W Ag	N
LJLA - G300	38	F	Y	04-02-2021	04-02-2021	03-02-2021	TN	TaqPath	N				NP	GENEDIA W Ag	N
LJLA - G301	47	F	Y	04-02-2021	04-02-2021	03-02-2021	TN	TaqPath	N				NP	GENEDIA W Ag	N
LJLA - G302	50	F	Y	04-02-2021	04-02-2021	28-01-2021	TN	TaqPath	N				NP	GENEDIA W Ag	N
LJLA - G303	67	F	Y	04-02-2021	04-02-2021	31-01-2021	TN	TaqPath	N				NP	GENEDIA W Ag	N
LJLA - G304	29	M	Y	04-02-2021	04-02-2021	02-02-2021	TN	TaqPath	N				NP	GENEDIA W Ag	N
LJLA - G305	24	F	Y	04-02-2021	04-02-2021	03-02-2021	TN	TaqPath	N				NP	GENEDIA W Ag	N
LJLA-268	60	F	Y	03-02-2021	03-02-2021	31-01-2021	TN	TaqPath	P	23.531	24.925		NP	GENEDIA W Ag	P
LJLA - G307	36	F	Y	04-02-2021	04-02-2021	01-02-2021	TN	TaqPath	N				NP	GENEDIA W Ag	N
LJLA - G308	31	M	Y	04-02-2021	04-02-2021	02-02-2021	TN	TaqPath	N				NP	GENEDIA W Ag	N
LJLA - G309	36	F	Y	04-02-2021	04-02-2021	04-02-2021	TN	TaqPath	N				NP	GENEDIA W Ag	N
LJLA - 057	57	M	Y	21-01-2021	21-01-2021	17-01-2021	TN	TaqPath	P	19.183	20.979		NP	GENEDIA W Ag	P
LJLA - G311	26	F	Y	04-02-2021	04-02-2021	03-02-2021	TN	TaqPath	N				NP	GENEDIA W Ag	N
LJLA - G312	33	F	Y	04-02-2021	04-02-2021	03-02-2021	TN	TaqPath	P	37.632			NP	GENEDIA W Ag	N
LJLA - G313	35	M	Y	04-02-2021	04-02-2021	02-02-2021	TN	TaqPath	N				NP	GENEDIA W Ag	N
LJLA - G314	56	F	Y	04-02-2021	04-02-2021	02-02-2021	TN	TaqPath	N				NP	GENEDIA W Ag	N
LJLA - G315	28	F	Y	05-02-2021	05-02-2021	04-02-2021	TN	TaqPath	N				NP	GENEDIA W Ag	N
LJLA - 094	36	F	Y	25-01-2021	25-01-2021	21-01-2021	TN	TaqPath	P	18.874	18.26	20.951	NP	GENEDIA W Ag	P
LJLA - G317	67	M	Y	10-02-2021	10-02-2021	09-02-2021	TN	TaqPath	N				NP	GENEDIA W Ag	N
LJLA - G318	38	F	Y	10-02-2021	10-02-2021	09-02-2021	TN	TaqPath	N				NP	GENEDIA W Ag	N
LJLA - G319	45	M	Y	10-02-2021	10-02-2021	09-02-2021	TN	TaqPath	N				NP	GENEDIA W Ag	N
LJLA - G320	34	F	Y	10-02-2021	10-02-2021	07-02-2021	TN	TaqPath	N				NP	GENEDIA W Ag	N
LJLA - G321	34	M	Y	10-02-2021	10-02-2021	08-02-2021	TN	TaqPath	N				NP	GENEDIA W Ag	N
LJLA - 146	55	F	Y	27-01-2021	27-01-2021	23-01-2021	TN	TaqPath	P	20.678	22.137	23.628	NP	GENEDIA W Ag	P
LJLA - G323	40	M	Y	10-02-2021	10-02-2021	09-02-2021	TN	TaqPath	N				NP	GENEDIA W Ag	N
LJLA - 180	83	M	Y	28-01-2021	28-01-2021	24-01-2021	TN	TaqPath	P	21.759	23. 63		NP	GENEDIA W Ag	P
LJLA - G325	39	M	Y	10-02-2021	10-02-2021	01-02-2021	TN	TaqPath	N				NP	GENEDIA W Ag	N
LJLA - G339	32	M	Y	10-02-2021	10-02-2021	09-02-2021	TN	TaqPath	N				NP	GENEDIA W Ag	N
LJLA - G340	46	F	Y	10-02-2021	10-02-2021	08-02-2021	TN	TaqPath	N				NP	GENEDIA W Ag	N
LJLA - 092	65	M	Y	22-01-2021	22-01-2021	18-01-2021	TN	TaqPath	P	27.468	27.76	27.1 6	NP	GENEDIA W Ag	N
LJLA - G342	27	F	Y	10-02-2021	10-02-2021	10-02-2021	TN	TaqPath	Indeterminate	38.891			NP	GENEDIA W Ag	N
LJLA - G343	39	F	Y	10-02-2021	10-02-2021	09-02-2021	TN	TaqPath	N				NP	GENEDIA W Ag	N
LJLA - G344	35	M	Y	10-02-2021	10-02-2021	04-02-2021	TN	TaqPath	N				NP	GENEDIA W Ag	N
LJLA - G345	53	F	Y	10-02-2021	10-02-2021	09-02-2021	TN	TaqPath	N				NP	GENEDIA W Ag	N
LJLA - G346	49	F	Y	10-02-2021	10-02-2021	05-02-2021	TN	TaqPath	N				NP	GENEDIA W Ag	N
LJLA - G347	30	M	Y	10-02-2021	10-02-2021	01-01-2999	TN	TaqPath	N				NP	GENEDIA W Ag	N
LJLA - G348	33	M	Y	10-02-2021	10-02-2021	09-02-2021	TN	TaqPath	N				NP	GENEDIA W Ag	N
LJLA - G352	70	M	Y	11-02-2021	11-02-2021	09-02-2021	TN	TaqPath	N				NP	GENEDIA W Ag	N
LJLA - G353	33	M	Y	11-02-2021	11-02-2021	09-02-2021	TN	TaqPath	N				NP	GENEDIA W Ag	N
LJLA - G354	18	F	Y	11-02-2021	11-02-2021	09-02-2021	TN	TaqPath	N				NP	GENEDIA W Ag	N
LJLA - G355	56	F	Y	11-02-2021	11-02-2021	10-02-2021	TN	TaqPath	N				NP	GENEDIA W Ag	N
LJLA - G356	36	F	Y	11-02-2021	11-02-2021	10-02-2021	TN	TaqPath	N				NP	GENEDIA W Ag	N
LJLA - G357	36	F	Y	11-02-2021	11-02-2021	10-02-2021	TN	TaqPath	N				NP	GENEDIA W Ag	N
LJLA - 181	72	F	Y	28-01-2021	28-01-2021	24-01-2021	TN	TaqPath	P	18.676	19.814		NP	GENEDIA W Ag	N
LJLA - G359	61	F	Y	11-02-2021	11-02-2021	23-01-2021	TN	TaqPath	N				NP	GENEDIA W Ag	N
LJLA - G360	41	F	Y	11-02-2021	11-02-2021	09-02-2021	TN	TaqPath	N				NP	GENEDIA W Ag	N
LJLA - G361	67	M	Y	11-02-2021	11-02-2021	10-02-2021	TN	TaqPath	N				NP	GENEDIA W Ag	N
LJLA - G362	68	M	Y	11-02-2021	11-02-2021	10-02-2021	TN	TaqPath	N				NP	GENEDIA W Ag	N
LJLA - G363	63	M	Y	12-02-2021	12-02-2021	11-02-2021	TN	TaqPath	N				NP	GENEDIA W Ag	P
LJLA - G364	56	F	Y	12-02-2021	12-02-2021	09-02-2021	TN	TaqPath	N				NP	GENEDIA W Ag	N
LJLA - G365	49	M	Y	12-02-2021	12-02-2021	08-02-2021	TN	TaqPath	N				NP	GENEDIA W Ag	N
LJLA - G366	36	F	Y	12-02-2021	12-02-2021	12-02-2021	TN	TaqPath	N				NP	GENEDIA W Ag	N
LJLA - G367	22	F	Y	12-02-2021	12-02-2021	12-02-2021	TN	TaqPath	N				NP	GENEDIA W Ag	N
LJLA - G368	48	F	Y	15-02-2021	15-02-2021	14-02-2021	TN	TaqPath	N				NP	GENEDIA W Ag	N
LJLA - G369	62	M	Y	15-02-2021	15-02-2021	15-02-2021	TN	TaqPath	N				NP	GENEDIA W Ag	N
LJLA - G370	47	M	Y	15-02-2021	15-02-2021	15-02-2021	TN	TaqPath	N				NP	GENEDIA W Ag	N
LJLA - G371	30	M	Y	15-02-2021	15-02-2021	14-02-2021	TN	TaqPath	N				NP	GENEDIA W Ag	N
LJLA - G372	26	M	Y	15-02-2021	15-02-2021	15-02-2021	TN	TaqPath	N				NP	GENEDIA W Ag	N
LJLA - G373	35	F	Y	15-02-2021	15-02-2021	14-02-2021	TN	TaqPath	N				NP	GENEDIA W Ag	N
LJLA - 242	64	F	Y	02-02-2021	02-02-2021	29-01-2021	TN	TaqPath	P	23.992	24.521	24.357	NP	GENEDIA W Ag	N
LJLA - G375	56	M	Y	15-02-2021	15-02-2021	26-12-2020	TN	TaqPath	N				NP	GENEDIA W Ag	N
LJLA - G376	40	F	Y	15-02-2021	15-02-2021	12-02-2021	TN	TaqPath	N				NP	GENEDIA W Ag	N
LJLA - G377	27	M	Y	15-02-2021	15-02-2021	13-02-2021	TN	TaqPath	N				NP	GENEDIA W Ag	N
LJLA - G378	34	M	Y	16-02-2021	16-02-2021	15-02-2021	TN	TaqPath	N				NP	GENEDIA W Ag	N
LJLA - 243	74	M	Y	02-02-2021	02-02-2021	29-01-2021	TN	TaqPath	P	24.313	25.03		NP	GENEDIA W Ag	N
LJLA - G380	53	F	Y	16-02-2021	16-02-2021	12-02-2021	TN	TaqPath	N		20.027		NP	GENEDIA W Ag	N
LJLA - G381	28	F	Y	16-02-2021	16-02-2021	13-02-2021	TN	TaqPath	N				NP	GENEDIA W Ag	N
LJLA - G382	34	F	Y	16-02-2021	16-02-2021	15-02-2021	TN	TaqPath	N				NP	GENEDIA W Ag	N
LJLA - G383	31	M	Y	16-02-2021	16-02-2021	13-02-2021	TN	TaqPath	N				NP	GENEDIA W Ag	N
LJLA - G316	48	F	Y	05-02-2021	05-02-2021	01-02-2021	TN	TaqPath	P	34.946	37.97		NP	GENEDIA W Ag	N
LJLA - G385	32	F	Y	16-02-2021	16-02-2021	16-02-2021	TN	TaqPath	N				NP	GENEDIA W Ag	N
LJLA - G384	25	M	Y	16-02-2021	16-02-2021	11-02-2021	TN	TaqPath	P	22.161	23.134	13.814	NP	GENEDIA W Ag	P
LJLA - G387	30	F	Y	17-02-2021	17-02-2021	16-02-2021	TN	TaqPath	N				NP	GENEDIA W Ag	N
LJLA - G388	70	M	Y	17-02-2021	17-02-2021	15-02-2021	TN	TaqPath	N				NP	GENEDIA W Ag	N
LJLA - G389	47	M	Y	17-02-2021	17-02-2021	16-02-2021	TN	TaqPath	N				NP	GENEDIA W Ag	N
LJLA - G390	52	M		18-02-2021	18-02-2021	14-02-2021	TN	TaqPath	N				NP	GENEDIA W Ag	N
LJLA - G391	20	F	Y	18-02-2021	18-02-2021	16-02-2021	TN	TaqPath	N				NP	GENEDIA W Ag	N
LJLA - G392	36	M	Y	18-02-2021	18-02-2021	17-02-2021	TN	TaqPath	N				NP	GENEDIA W Ag	N
LJLA - G393	35	F	Y	18-02-2021	18-02-2021	16-02-2021	TN	TaqPath	N				NP	GENEDIA W Ag	N
LJLA-264	55	F	Y	03-02-2021	03-02-2021	29-01-2021	TN	TaqPath	P	14.996	15.594		NP	GENEDIA W Ag	P
LJLA - G395	61	M	Y	19-02-2021	19-02-2021	17-02-2021	TN	TaqPath	N				NP	GENEDIA W Ag	N
LJLA-265	63	M	Y	03-02-2021	03-02-2021	29-01-2021	TN	TaqPath	P	18.028	17.223		NP	GENEDIA W Ag	P
LJLA - G397	57	F	Y	19-02-2021	19-02-2021	17-02-2021	TN	TaqPath	N				NP	GENEDIA W Ag	N
LJLA - G398	53	M	Y	19-02-2021	19-02-2021	16-02-2021	TN	TaqPath	N				NP	GENEDIA W Ag	N
LJLA - G399	40	M	Y	19-02-2021	19-02-2021	19-02-2021	TN	TaqPath	N				NP	GENEDIA W Ag	N
LJLA - G400	35	F	Y	19-02-2021	19-02-2021	18-02-2021	TN	TaqPath	N				NP	GENEDIA W Ag	N
LJLA - G401	23	F	Y	19-02-2021	19-02-2021	16-02-2021	TN	TaqPath	N				NP	GENEDIA W Ag	N
LJLA-221	66	M	Y	01-02-2021	01-02-2021	01-01-2999	TN	TaqPath	N				NP	GENEDIA W Ag	N
LJLA-222	38	M	Y	01-02-2021	01-02-2021	31-01-2021	TN	TaqPath	N				NP	GENEDIA W Ag	N
LJLA-223	32	M	Y	01-02-2021	01-02-2021	29-01-2021	TN	TaqPath	N				NP	GENEDIA W Ag	N
LJLA-224	59	M	Y	01-02-2021	01-02-2021	29-01-2021	TN	TaqPath	N				NP	GENEDIA W Ag	N
LJLA-225	39	M	Y	01-02-2021	01-02-2021	31-01-2021	TN	TaqPath	N				NP	GENEDIA W Ag	N
LJLA-226	63	M	Y	01-02-2021	01-02-2021	31-01-2021	TN	TaqPath	N				NP	GENEDIA W Ag	N
LJLA-227	66	M	Y	01-02-2021	01-02-2021	29-01-2021	TN	TaqPath	N				NP	GENEDIA W Ag	N
LJLA-228	39	M	Y	01-02-2021	01-02-2021	30-01-2021	TN	TaqPath	N				NP	GENEDIA W Ag	N
LJLA-229	41	M	Y	01-02-2021	01-02-2021	30-01-2021	TN	TaqPath	N				NP	GENEDIA W Ag	N
LJLA - 002	60	M	Y	15-01-2021	15-01-2021	09-01-2021	TN	TaqPath	P	18.933	20.839		NP	GENEDIA W Ag	P
LJLA - 010	59	F	Y	15-01-2021	15-01-2021	08-01-2021	TN	TaqPath	P	21.4 1	23.38		NP	GENEDIA W Ag	P
LJLA-232	33	M	Y	01-02-2021	01-02-2021	01-02-2021	TN	TaqPath	N				NP	GENEDIA W Ag	N
LJLA-233	18	F	Y	01-02-2021	01-02-2021	29-01-2021	TN	TaqPath	N				NP	GENEDIA W Ag	N
LJLA-269	62	M	Y	03-02-2021	03-02-2021	27-01-2021	TN	TaqPath	P	25.85	27.048		NP	GENEDIA W Ag	P
LJLA-235	22	M	Y	01-02-2021	01-02-2021	29-01-2021	TN	TaqPath	N				NP	GENEDIA W Ag	N
LJLA-236	47	F	Y	01-02-2021	01-02-2021	30-01-2021	TN	TaqPath	N				NP	GENEDIA W Ag	N
LJLA-263	36	F	Y	03-02-2021	03-02-2021	01-02-2021	TN	TaqPath	N				NP	GENEDIA W Ag	N
LJLA - 069	62	M	Y	22-01-2021	22-01-2021	14-01-2021	TN	TaqPath	P		39.326	33.43	NP	GENEDIA W Ag	N
LJLA - G324	30	F	Y	10-02-2021	10-02-2021	01-02-2021	TN	TaqPath	P	23.24	22.188	26.477	NP	GENEDIA W Ag	P
LJLA-266	34	M	Y	03-02-2021	03-02-2021	02-01-2021	TN	TaqPath	N				NP	GENEDIA W Ag	N
LJLA - G310	44	F	Y	04-02-2021	04-02-2021	26-01-2021	TN	TaqPath	P	35.352	36.3 4		NP	GENEDIA W Ag	N
LJLA - 009	49	F	Y	15-01-2021	15-01-2021	05-01-2021	TN	TaqPath	P	16.425	17.11	25.751	NP	GENEDIA W Ag	P
LJLA - G292	63	M	Y	04-02-2021	04-02-2021	24-01-2021	TN	TaqPath	P	22.412	23.893		NP	GENEDIA W Ag	P
LJLA-270	59	M	Y	03-02-2021	03-02-2021	03-01-2021	TN	TaqPath	N				NP	GENEDIA W Ag	N
LJLA-271	46	F	Y	03-02-2021	03-02-2021	02-02-2021	TN	TaqPath	N				NP	GENEDIA W Ag	N
LJLA - G293	62	F	Y	04-02-2021	04-02-2021	24-01-2021	TN	TaqPath	P	25.13	22.543	31.11	NP	GENEDIA W Ag	N
LJLA-273	50	F	Y	03-02-2021	03-02-2021	02-02-2021	TN	TaqPath	N				NP	GENEDIA W Ag	N
LJLA-274	55	F	Y	03-02-2021	03-02-2021	29-01-2021	TN	TaqPath	N				NP	GENEDIA W Ag	N
LJLA-275	38	F	Y	03-02-2021	03-02-2021	02-02-2021	TN	TaqPath	N				NP	GENEDIA W Ag	N
LJLA-276	67	F	Y	03-02-2021	03-02-2021	01-02-2021	TN	TaqPath	N				NP	GENEDIA W Ag	N
